# Supplementary material for: Megakaryocyte progenitor cell function is enhanced upon aging despite the functional decline of aged hematopoietic stem cells
Source: PubMed Central journal article supplement — Stem Cell Reports. 2021 May 20;16(6):1598–613. doi: 10.1016/j.stemcr.2021.04.016 (PMC8190594; doi:10.1016/j.stemcr.2021.04.016), 2021-05-20
Supplement: mmc1.pdf [file mmc1.pdf]

**Stem Cell Reports, Volume 16**

**Supplemental Information**

**Megakaryocyte progenitor cell function is enhanced upon aging despite the functional decline of aged hematopoietic stem cells**

**Donna M. Poscablo, Atesh K. Worthington, Stephanie Smith-Berdan, and E. Camilla Forsberg**

## **SUPPLEMENTAL INFORMATION**

### **Megakaryocyte Progenitor Cell Function is Enhanced Upon Aging Despite the Functional Decline of Aged Hematopoietic Stem Cells**

Donna M. Poscablo<sup>1,2</sup>, Atesh K. Worthington<sup>1,2</sup>, Stephanie Smith-Berdan<sup>1</sup>, E. Camilla Forsberg<sup>1,3\*</sup>

<sup>1</sup> Institute for the Biology of Stem Cells, University of California-Santa Cruz, Santa Cruz, CA, USA

<sup>2</sup> Program in Biomedical Sciences and Engineering, Department of Molecular, Cell, and Developmental Biology, University of California-Santa Cruz, Santa Cruz, CA 95064, USA.

<sup>3</sup> Biomolecular Engineering, University of California-Santa Cruz, Santa Cruz, CA, USA

\* Correspondence: cforsber@ucsc.edu

#### **Supplemental Experimental Procedures**

**Supplemental Figure 1, with legend: Related to Figure 4**

**Supplemental Table 1: Related to Figure 7**

**Supplemental Table 2: Related to Figure 7**

## SUPPLEMENTAL EXPERIMENTAL PROCEDURES

### Mouse lines

All animals were housed and bred in the AAALAC accredited vivarium at UC Santa Cruz and maintained under approved IACUC guidelines. The following mice were utilized for these experiments: C57Bl6 (JAX, cat# 664), aged C57Bl6 (NIH-ROS), BoyJ (JAX, cat# 2014), Ubc-GFP (JAX, cat# 4353).

### Flow Cytometry

Bone marrow stem and progenitor cell populations and mature cell subsets were prepared and stained as previously described (Beaudin et al., 2014, 2016; Leung et al., 2019; Martin et al., 2021; Smith-Berdan et al., 2015, 2019; Ugarte et al., 2015). Briefly, the long bones (femur and tibia) from mice were isolated, crushed with a mortar and pestle, filtered through a 70 $\mu$ m nylon filter and pelleted by centrifugation to obtain a single cell suspension. APC-conjugated spherobeads (BD Bioscience) were added to the cell suspension prior to staining cells with fluorescently labeled antibodies to cell surface antigens. Cell labeling was performed on ice in 1X PBS with 5 mM EDTA and 2% serum. The stem and progenitor populations within the bone marrow were characterized as: HSC: Lin<sup>-</sup>/cKit<sup>+</sup>/Sca1<sup>+</sup>/Flk2<sup>-</sup>/Slamf<sup>+</sup>, MPP: Lin<sup>-</sup>/cKit<sup>+</sup>/Sca1<sup>+</sup>/Flk2<sup>+</sup>/Slamf<sup>-</sup>, MkP: Lin<sup>-</sup>/cKit<sup>+</sup>/Sca1<sup>-</sup>/CD41<sup>+</sup>/Slamf<sup>+</sup>, CMP: Lin<sup>-</sup>/cKit<sup>+</sup>/Sca1<sup>-</sup>/Fc $\gamma$ R<sup>mid</sup>/CD34<sup>mid</sup>, GMP: Lin<sup>-</sup>/cKit<sup>+</sup>/Sca1<sup>-</sup>/Fc $\gamma$ R<sup>high</sup>/CD34<sup>high</sup>, MEP: Lin<sup>-</sup>/cKit<sup>+</sup>/Sca1<sup>-</sup>/Fc $\gamma$ R<sup>-</sup>/CD34<sup>-</sup>, Pre-GM (Pronk): Lin<sup>-</sup>/cKit<sup>+</sup>/Sca1<sup>-</sup>/CD41<sup>-</sup>/Fc $\gamma$ R<sup>-</sup>/CD150<sup>-</sup>/Endoglin<sup>-</sup>, Pre-Meg (Pronk): Lin<sup>-</sup>/cKit<sup>+</sup>/Sca1<sup>-</sup>/CD41<sup>-</sup>/Fc $\gamma$ R<sup>-</sup>/CD150<sup>+</sup>/Endoglin<sup>-</sup>, Pre-CFU-E (Pronk): Lin<sup>-</sup>/cKit<sup>+</sup>/Sca1<sup>-</sup>/CD41<sup>-</sup>/Fc $\gamma$ R<sup>-</sup>/CD150<sup>+</sup>/Endoglin<sup>+</sup>. Mature cells were characterized by: erythroid cells as circulating erythrocyte progenitors: (FSC<sup>lo-mid</sup>/Ter-119<sup>+</sup>/CD71<sup>+</sup>/Mac1<sup>-</sup>/Gr1<sup>-</sup>/B220<sup>-</sup>/CD3<sup>-</sup>) or erythrocytes: (FSC<sup>lo-mid</sup>/Ter-119<sup>+</sup>/CD61<sup>-</sup>/Mac1<sup>-</sup>/Gr1<sup>-</sup>/B220<sup>-</sup>/CD3<sup>-</sup>), platelets: (SSC<sup>lo</sup>/Ter-119<sup>-</sup>/CD61<sup>+</sup>/Mac1<sup>-</sup>/Gr1<sup>-</sup>/B220<sup>-</sup>/CD3<sup>-</sup>), GM (Ter-119<sup>-</sup>/CD61<sup>-</sup>/Mac1<sup>+</sup>/Gr1<sup>+</sup>/B220<sup>-</sup>/CD3<sup>-</sup>), B-cell (Ter-119<sup>-</sup>/CD61<sup>-</sup>/Mac1<sup>-</sup>/Gr1<sup>-</sup>/B220<sup>+</sup>/CD3<sup>-</sup>), T-cell (Ter-119<sup>-</sup>/CD61<sup>-</sup>/Mac1<sup>-</sup>/Gr1<sup>-</sup>/B220<sup>-</sup>/CD3<sup>+</sup>). Cell suspensions were analyzed for specific cell populations using FACS Aria III (Becton Dickinson, San Jose, CA).

The lineage cocktail was comprised of CD3 (Biolegend cat #100306), CD4 (Biolegend cat #100423), CD5 (Biolegend cat #100612), CD8 (Biolegend cat #100723), Ter-119 (Biolegend cat #116215), Mac1 (Biolegend cat #101217), Gr1 (Biolegend cat #108417), and B220 (Biolegend cat #103225). Antibodies used in sorting were:

cKit(Biolegend cat #105826), Sca1 (Biolegend cat #122520), CD150 (Biolegend cat #115914), FLK2 (ebiosciences cat #12-1351-83), CD34 (ebiosciences cat #13-0341-85), CD41 (Biolegend cat #133914), CD105 (Biolegend cat #120402). Antibodies used in peripheral blood were: CD71 (Biolegend cat # 113803), CD61 (Biolegend cat # 104314), CD3 (Biolegend cat #100306), TER-119 (Biolegend cat #116215), Mac1 (Biolegend cat #101217), Gr1 (Biolegend cat #108417), and B220 (Biolegend cat #103225).

#### HSC and MkP sorts by Flow Cytometry

HSC ( $\text{Lin}^-/\text{cKit}^+/\text{Sca1}^+/\text{Flk2}^-/\text{Slam}^+$ ) or MkP ( $\text{Lin}^-/\text{cKit}^+/\text{Sca1}^-/\text{CD41}^+/\text{Slam}^+$ ) from young or old mice were prospectively isolated using a FACS ARIA III (Becton Dickinson, San Jose, CA) as previously described (Boyer et al., 2019; Leung et al., 2019; Martin et al., 2021). Cells were harvested from long bones as mentioned above and stained with CD117-microbeads (Miltenyi), then passed over a magnetic column to enrich for CD117<sup>+</sup> stem and progenitor cells. HSC and MkP cell populations were double-sorted on low pressure with a 100 $\mu\text{m}$  nozzle into PBS, 2% serum.

#### Transplantation Reconstitution assays

Reconstitution assays were performed by transplanting double-sorted HSCs (200 per recipient) from young or old Ubc-GFP<sup>+</sup> whole bone marrow and transplanting into congenic C57Bl6 mice via retro-orbital intravenous transplant. We also transplanted double-sorted MkPs (22,000 per recipient) from C57Bl6 into Ubc-GFP<sup>+</sup> hosts. Hosts were preconditioned with sub-lethal radiation (~750 rads) using a Faxitron CP160 X-ray instrument (Precision Instruments). Recipient mice were bled via the tail vein at the indicated intervals post-transplantation for analysis of peripheral blood donor chimerism. APC-labeled spherobeads were added to whole peripheral blood prior to staining with B220-APCy7, CD3-A700, Mac1-PECy7, Ter119-PECy5, Gr1-PB, CD71-Biotin/STABV605, and CD61-Alexa-647 (Biolegend) to detect mature lineage subsets for both host and donor mice. Cell suspensions were analyzed by FACS Aria III or LSR II (Becton Dickinson, San Jose, CA) for whole blood phenotypes and again post red blood cell lysis with a hypotonic alkaline lysis solution (ACK). Cells counts were calculated based on the number of cells analyzed and known number spherobeads added per sample.

### *In vitro* Proliferation

Megakaryocyte progenitors were prospectively isolated using CD117-Microbead enrichment (Miltenyi) and sorted by fluorescence-activated cell sorting (FACS) from young (6-12 weeks old) and old WT (20-24 months old) mice as previously described (Smith-Berdan et al., 2015). 2000 cells were plated per well into a 96-well U-bottom tissue culture plate. Sorted cells were cultured for 3 days (MkP) in 200 $\mu$ l/well containing IMDM medium (Fisher) supplemented with 10% FBS, 50ng/ml rmTPO, 20ng/ml rmlL-6, 20ng/ml of rmlL-11, 50ng/ml of rmSCF, and 10ng/ml rmlL-3 (Cytokines from Peprotech) and Primocin (Invivogen). On days 3 APC-labeled spherobeads (BD Bioscience) were added to appropriate wells with cells and triplicate samples were analyzed using a FACS Aria (Becton Dickinson, San Jose, CA). Cell expansion rates were calculated based on the number of beads recovered per beads added per well.

# SUPPLEMENTAL FIGURE 1

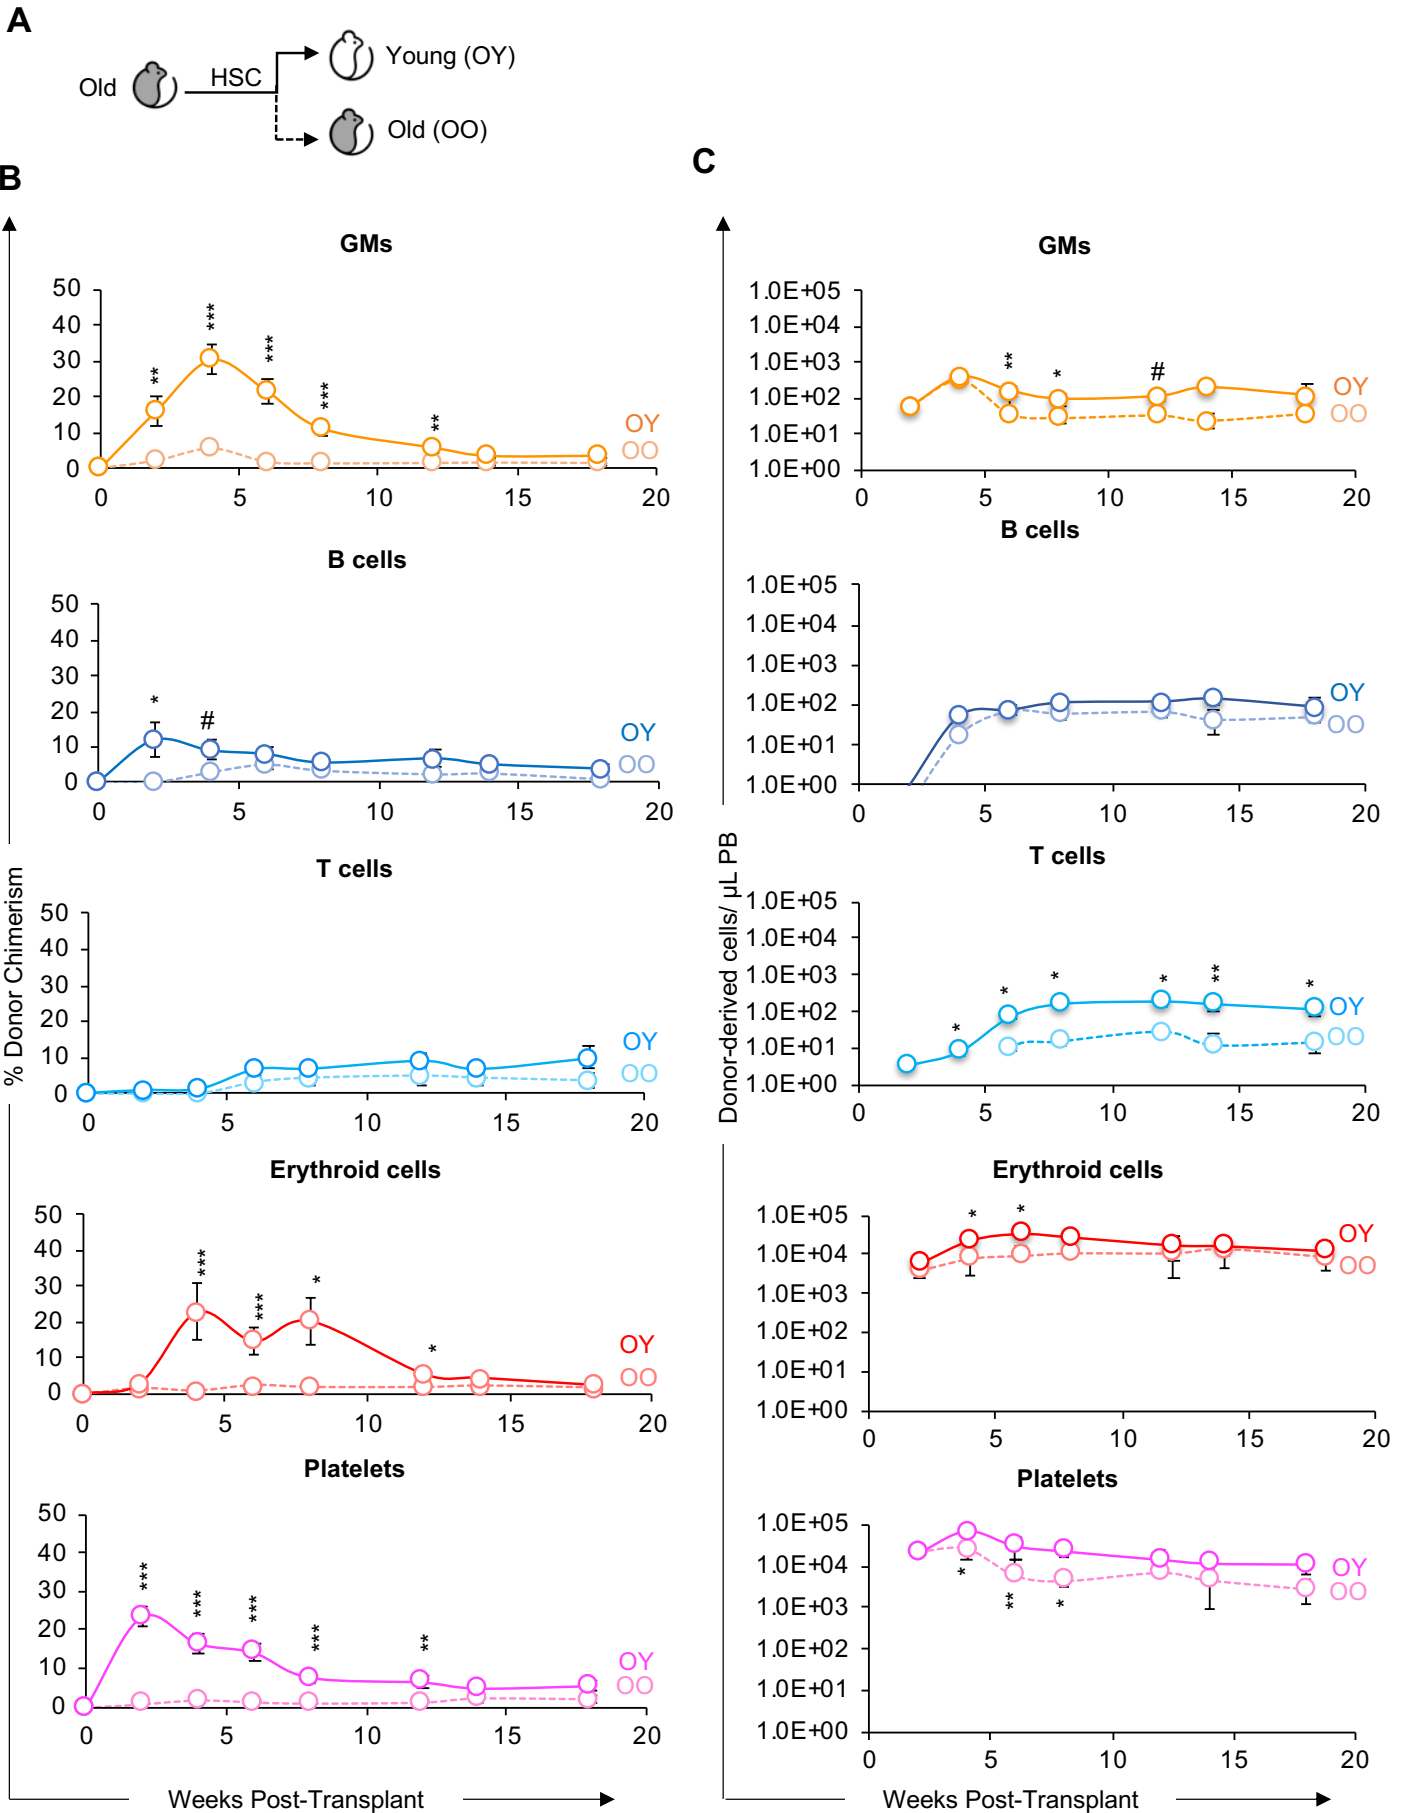

**Supplemental Figure 1: Old HSCs exhibited lower reconstitution potential in old compared to young recipients**

(A) Schematic of transplantation of HSCs from old mice into separate cohorts of young or old mice.

(B) Old HSCs displayed lower donor-host-chimerism in the old recipients compared to in young recipients.

Analysis of donor-derived mature cells (GMs, B cells, T cells, erythroid cells, and platelets) in peripheral blood of recipients presented as percent donor chimerism.

(C) Old HSCs produced fewer total mature cells in old recipients compared to in young recipients.

Reconstitution data from (B) replotted as absolute number of donor-derived GMs, B cells, T cells, erythroid cells, and platelets per microliter of peripheral blood.

Data are representative means  $\pm$  SEM from 12 young recipient mice (7 independent experiments) and 8 old recipient mice (3 independent experiments). P values were determined using unpaired two-tailed t-test. \*p < 0.05, \*\*p < 0.005, \*\*\*p < 0.0005.

# SUPPLEMENTAL TABLE 1

**Table 1: Top 50 differentially expressed genes between young and old MkPs**

| Gene symbol | Log2 Fold Change | P-value  | Basemean Young | Basemean Old |
|-------------|------------------|----------|----------------|--------------|
| Tubb6       | -1.5234473       | 8.40E-08 | 3.90E+02       | 1.35E+02     |
| AI506816    | -1.4245791       | 8.12E-04 | 7.89E+03       | 2.94E+03     |
| Tmem97      | -1.3199598       | 7.64E-04 | 2.94E+03       | 1.18E+03     |
| Atp5k       | -1.2412058       | 1.39E-03 | 1.23E+03       | 5.21E+02     |
| Emid1       | -1.2234213       | 5.17E-03 | 1.74E+03       | 7.44E+02     |
| Dnajc15     | -1.1961287       | 5.12E-03 | 2.48E+03       | 1.08E+03     |
| Bckdhb      | -1.1225232       | 1.72E-03 | 4.86E+02       | 2.24E+02     |
| Phgdh       | -1.094522        | 5.00E-03 | 9.78E+03       | 4.58E+03     |
| Nup37       | -1.0609982       | 6.96E-04 | 8.68E+02       | 4.17E+02     |
| Tbrg4       | -1.0608148       | 6.07E-04 | 9.99E+02       | 4.79E+02     |
| Uqcc2       | -1.0583517       | 8.25E-04 | 1.77E+03       | 8.51E+02     |
| Hspe1       | -1.0582077       | 2.34E-03 | 4.33E+03       | 2.08E+03     |
| Timm8a1     | -1.0572596       | 3.59E-03 | 2.14E+03       | 1.03E+03     |
| Tmem258     | -1.0394034       | 2.15E-03 | 1.29E+03       | 6.30E+02     |
| Tysnd1      | -1.0359832       | 4.98E-04 | 2.15E+03       | 1.05E+03     |
| Rpf2        | -1.0327924       | 1.70E-03 | 9.38E+02       | 4.59E+02     |
| Mecr        | -1.0214637       | 2.34E-07 | 6.37E+02       | 3.15E+02     |
| Yars        | -1.0198991       | 3.54E-03 | 1.97E+03       | 9.71E+02     |
| F10         | -1.0169751       | 1.05E-04 | 1.13E+03       | 5.60E+02     |
| Gchfr       | -1.0166502       | 6.24E-03 | 3.92E+02       | 1.94E+02     |
| Asns        | -1.0166478       | 3.58E-03 | 3.50E+03       | 1.73E+03     |
| Wdr18       | -1.0000778       | 7.12E-04 | 5.85E+03       | 2.93E+03     |
| Mrps18a     | -0.9960708       | 2.40E-04 | 3.19E+03       | 1.60E+03     |
| Coq7        | -0.9954788       | 2.70E-03 | 1.26E+03       | 6.32E+02     |
| Atp5e       | -0.9929881       | 2.03E-03 | 2.24E+03       | 1.13E+03     |
| Pik3ip1     | 2.1552087        | 1.66E-03 | 2.42E+02       | 1.08E+03     |
| AK165889    | 2.1835855        | 1.01E-03 | 1.50E+02       | 6.81E+02     |
| Selp        | 2.2508835        | 8.79E-04 | 4.96E+02       | 2.36E+03     |
| Krt18       | 2.2564015        | 3.52E-04 | 2.25E+02       | 1.07E+03     |
| Nfkbia      | 2.3271007        | 1.32E-06 | 4.50E+02       | 2.26E+03     |
| Selm        | 2.4368411        | 1.28E-03 | 1.22E+02       | 6.59E+02     |
| Selm        | 2.4466799        | 1.21E-03 | 1.19E+02       | 6.48E+02     |
| Hbb-bt      | 2.4514855        | 1.05E-03 | 2.92E+02       | 1.60E+03     |
| Gstm2       | 2.4781945        | 2.66E-03 | 1.74E+02       | 9.67E+02     |
| Clu         | 2.6034299        | 6.48E-03 | 7.73E+02       | 4.70E+03     |
| Hbb-bs      | 2.8180971        | 5.94E-04 | 6.86E+02       | 4.83E+03     |
| Lcp1        | 2.8224804        | 1.14E-06 | 1.75E+02       | 1.24E+03     |
| Tgm2        | 2.8253432        | 2.47E-04 | 1.10E+02       | 7.81E+02     |
| Nupr1       | 2.8873895        | 6.77E-05 | 1.92E+02       | 1.42E+03     |
| H2-Ab1      | 2.9240602        | 3.72E-10 | 2.63E+02       | 1.99E+03     |
| Galnt6      | 2.9439361        | 2.55E-05 | 1.02E+02       | 7.87E+02     |
| C1qb        | 3.0211859        | 4.90E-03 | 3.14E+02       | 2.55E+03     |
| C1qc        | 3.1118748        | 4.54E-03 | 1.30E+02       | 1.12E+03     |
| Aldh1a1     | 3.8871329        | 2.06E-15 | 1.29E+02       | 1.91E+03     |
| S100a8      | 4.7393422        | 2.40E-04 | 2.05E+02       | 5.47E+03     |
| Ngp         | 5.4444377        | 7.87E-05 | 8.30E+02       | 3.61E+04     |
| Cd74        | 5.5091778        | 3.86E-25 | 1.61E+02       | 7.35E+03     |
| Camp        | 5.9138395        | 2.85E-05 | 1.02E+02       | 6.13E+03     |
| Chil3       | 6.0448889        | 5.37E-05 | 1.02E+02       | 6.77E+03     |
| Ltf         | 6.1725772        | 2.75E-05 | 2.76E+02       | 1.99E+04     |
