# Supplementary material for: Megakaryocyte progenitor cell function is enhanced upon aging despite the functional decline of aged hematopoietic stem cells
Source: PubMed Central journal article supplement — Stem Cell Reports. 2021 May 20;16(6):1598–613. doi: 10.1016/j.stemcr.2021.04.016 (PMC8190594; doi:10.1016/j.stemcr.2021.04.016), 2021-05-20
Supplement: mmc2.pdf [file mmc2.pdf]

# Megakaryocyte progenitor cell function is enhanced upon aging despite the functional decline of aged hematopoietic stem cells

Donna M. Poscablo,<sup>1,2</sup> Atesh K. Worthington,<sup>1,2</sup> Stephanie Smith-Berdan,<sup>1</sup> and E. Camilla Forsberg<sup>1,3,\*</sup>

<sup>1</sup>Institute for the Biology of Stem Cells, University of California-Santa Cruz, Santa Cruz, CA, USA

<sup>2</sup>Program in Biomedical Sciences and Engineering, Department of Molecular, Cell, and Developmental Biology, University of California-Santa Cruz, Santa Cruz, CA 95064, USA

<sup>3</sup>Biomolecular Engineering, University of California-Santa Cruz, Santa Cruz, CA, USA

\*Correspondence: [cforsber@ucsc.edu](mailto:cforsber@ucsc.edu)

<https://doi.org/10.1016/j.stemcr.2021.04.016>

## SUMMARY

Age-related morbidity is associated with a decline in hematopoietic stem cell (HSC) function, but the mechanisms of HSC aging remain unclear. We performed heterochronic HSC transplants followed by quantitative analysis of cell reconstitution. Although young HSCs outperformed old HSCs in young recipients, young HSCs unexpectedly failed to outcompete the old HSCs of aged recipients. Interestingly, despite substantial enrichment of megakaryocyte progenitors (MkPs) in old mice *in situ* and reported platelet (Plt) priming with age, transplanted old HSCs were deficient in reconstitution of all lineages, including MkPs and Plts. We therefore performed functional analysis of young and old MkPs. Surprisingly, old MkPs displayed unmistakably greater regenerative capacity compared with young MkPs. Transcriptome analysis revealed putative molecular regulators of old MkP expansion. Collectively, these data demonstrated that aging affects HSCs and megakaryopoiesis in fundamentally different ways: whereas old HSCs functionally decline, MkPs gain expansion capacity upon aging.

## INTRODUCTION

The elderly population is affected by numerous hematological abnormalities, including decreasing capacity to mount an immune response, increasing incidences of thrombotic cardiovascular disorders, and dramatically increased incidence of myelogenous diseases. Dysfunctions during chronological aging is paralleled by the declining functionality of hematopoietic stem cells (HSCs), leading to conclusions that the age-related pathologies of the blood manifests within the HSC compartment (Elias et al., 2017). HSCs self-renew and differentiate, giving rise to progenitor cells that are committed to either the myeloid or lymphoid lineage throughout the lifespan. However, there is convincing evidence that HSCs lose the full extent of these properties during aging. Evaluation of aged HSCs in transplantation studies has demonstrated reduced regenerative potential compared with young HSCs. Aged HSCs seem to be less effective at homing and engrafting in the host, suggesting that alterations to HSCs during aging persist (become intrinsic) on transplantation (Dykstra et al., 2011; Morrison et al., 1996; Rossi et al., 2005; Sudo et al., 2000). In those experiments, HSC multipotency has been traditionally defined by qualitative measurements of GM, B, and T cell donor-to-host chimerism; more quantitative measurements and direct tracking of erythroid cells and platelets (Plt) from hematopoietic stem and progenitor cells (HSPCs) were developed relatively recently to rectify limitations of transplantation experiments that focus on only white blood cell reconstitution (Boyer et al., 2019; Hamanaka et al., 2013; Schaefer et al., 2001; Yamamoto et al., 2013). In addition, analysis of HSCs at the single cell level has identi-

fied an increased molecular Plt priming and functional Plt bias in the old HSC compartment (Grover et al., 2016; Sanjuan-Pla et al., 2013; Yamamoto et al., 2018). These alterations raise the need to understand potential alterations in megakaryocyte differentiation in aged mice and humans.

The varying challenges to the blood system during aging may lead to alterations to multiple levels of differentiation, resulting in the dysregulation of homeostatic control maintained by committed progenitors. Previous studies have noted that the bone marrow (BM) frequencies of committed lymphoid and myeloid progenitors are altered with age (De Haan and Van Zant, 1999; Miller and Allman, 2003; Morrison et al., 1996; Rossi et al., 2005), but the functional properties and roles of hematopoietic progenitor cells during aging remains an enigma. Here, we investigated young and old HSCs and the contribution of both intrinsic changes and the environment on their differentiation. In our analysis, we included quantitative measurements of their erythroid and Plt production, as well as assessment of progenitor cells at steady-state and upon heterochronic HSC transplantation. These findings prompted us to further pursue age-associated changes in the Plt lineage, leading to unexpected revelations on the effect of aging on megakaryopoiesis.

## RESULTS

### Both the frequencies and numbers of hematopoietic stem and progenitor cell populations are altered during aging

Aging has been shown to alter the frequencies of HSCs in the BM (De Haan and Van Zant, 1999; Morrison et al.,

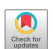

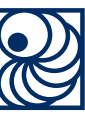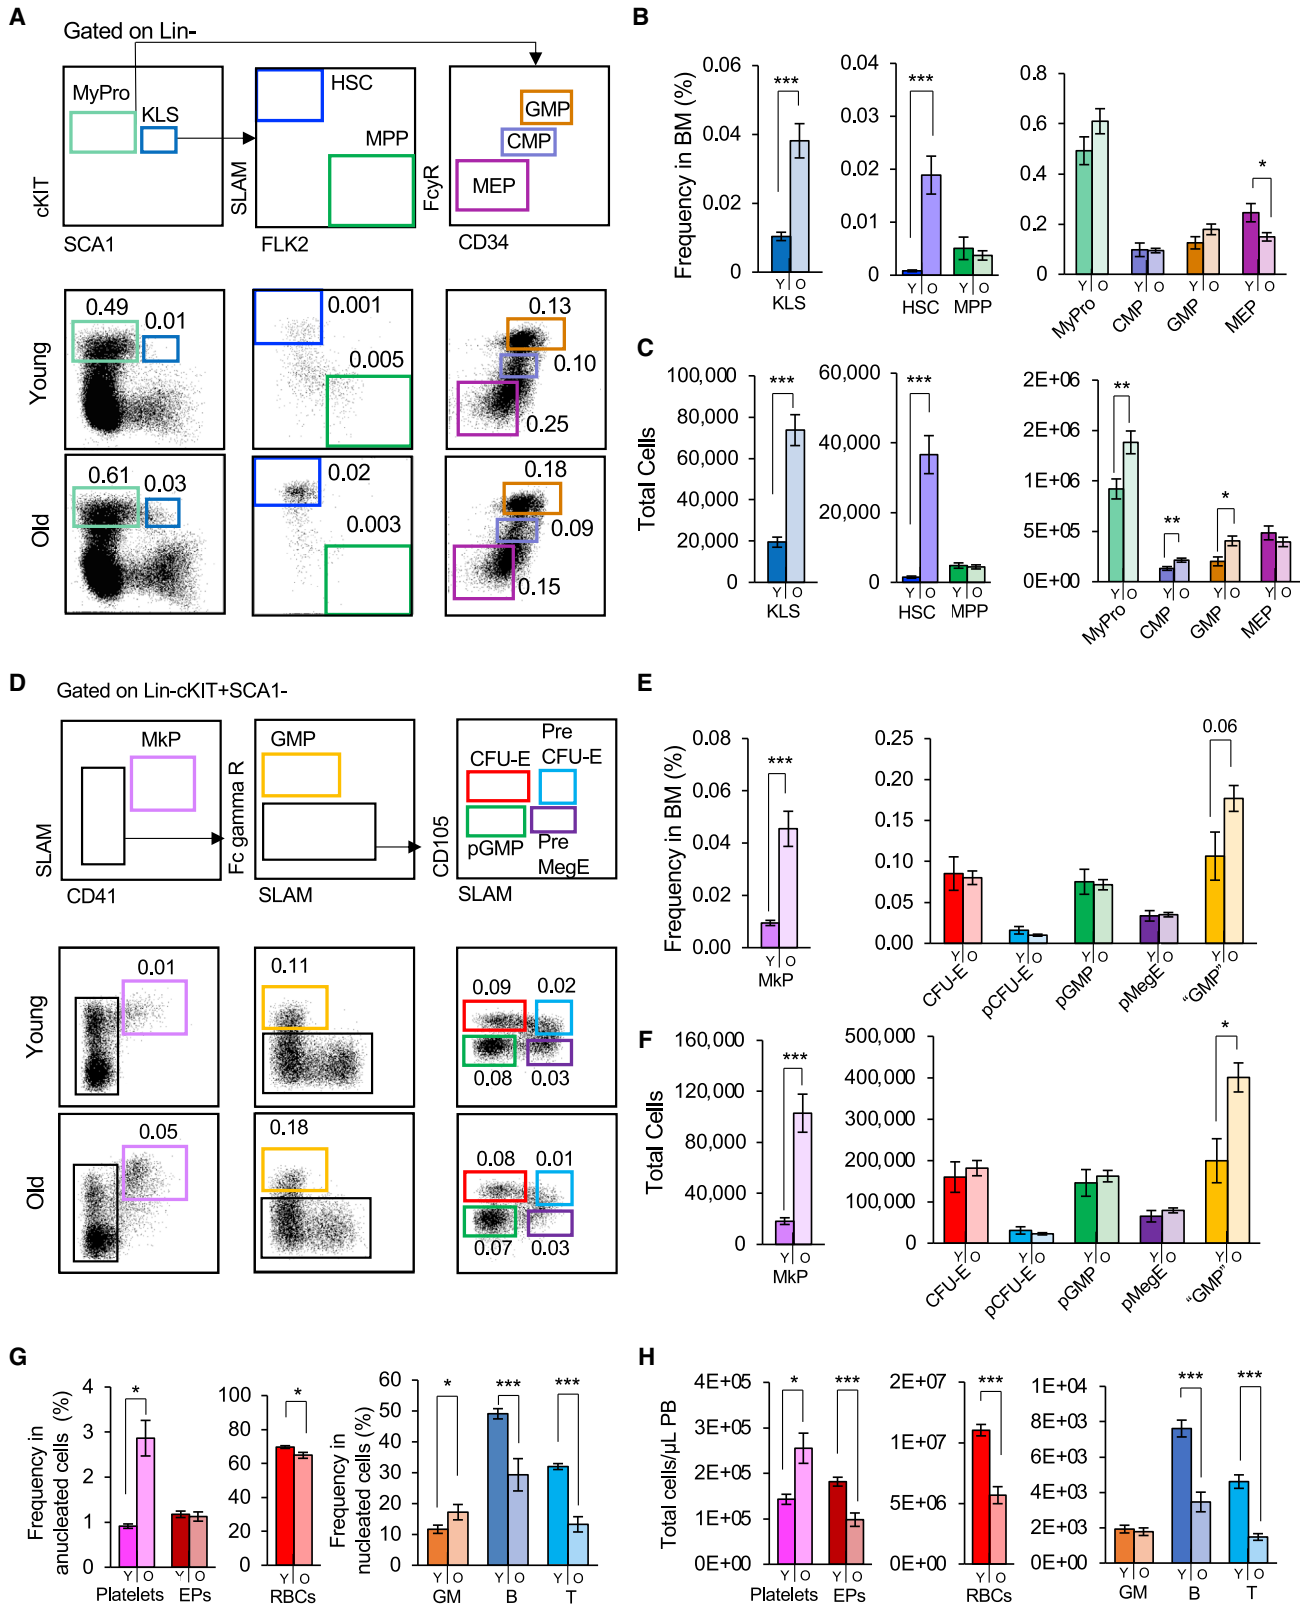

(legend on next page)

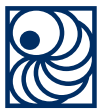

1996; Rossi et al., 2005; Sudo et al., 2000). To evaluate if similar patterns were observed in the total cell numbers and of more refined erythromyeloid populations (Pronk et al., 2007), we compared the absolute cell numbers of HSPC populations between young and old mice. Consistent with previous reports, the frequencies of the cKit + Lineage-Sca1+ (KLS) population increased dramatically with age (Figures 1A and 1B). This increase was also observed when presented as total cell numbers (Figure 1C). When we further fractionated the KLS compartment, we found that this KLS abundance in the old BM was due to a dramatic enrichment of old HSCs. By contrast, the frequency and number of MPPs remained consistent throughout life. The Myeloid Progenitor (MyPro) compartment increased in total cell numbers, but not frequency. Classically defined CMPs and GMPs (Akashi et al., 2000) were found at similar frequencies in young and old BM, while MEP frequencies were reduced with age (Figure 1B). Due to the overall increased cell numbers with age, however, absolute quantification revealed an increase in CMP and GMP numbers, but no change in MEPs, in old BM.

We also investigated erythromyeloid populations more recently defined by alternative markers within the MyPro compartment (Figure 1D) (Pronk et al., 2007). Few age-related alterations in frequencies and numbers were observed: CFU-E, pCFU-E, pGMP, and pMegE frequencies and numbers were not significantly altered (Figures 1E and 1F). Alternatively defined “GMPs” trended toward an increase in frequency and were significantly increased in absolute numbers (Figures 1E and 1F), consistent with the highly overlapping classical GMPs (Figures 1B and 1C). Intriguingly, we observed a dramatic increase in both the frequency and total cell numbers of phenotypically defined MkPs in old mice (Figures 1E and 1F). The aging hematopoietic system has been reported to include

alterations to circulating mature cells (Valletta et al., 2020; Young et al., 2020). Consistent with previous reports, we also observed age-related increase in Plt frequencies and numbers, whereas erythroid cells decreased (Figures 1G and 1H). Our data also recapitulated reported myeloid bias among nucleated cells, primarily driven by a decrease in B and T cells (Figures 1G and 1H). These data revealed that the composition of HSPC populations selectively changes during aging. Of note was the dramatic expansion of old HSCs and old MkPs, accompanied by a significant increase in circulating Plts, raising the need to explore megakaryopoiesis during the aging process.

### Old HSCs exhibit impaired reconstitution potential compared with young HSCs

To directly interrogate the differences in reconstitution potential between young and old HSCs, we purified HSCs from fluorescent young or old mice and transplanted them into young recipients (Figure 2A). These experiments are analogous to those performed previously by others (Ergen et al., 2012; Rossi et al., 2005), except we expanded aforementioned investigations by also including direct detection of donor-derived Plts and circulating erythroid cells, in addition to the more commonly assayed granulocytes/myelomonocytes (GMs), and B and T cells.

First, also as commonly done, we determined the reconstitution kinetics of HSCs by measuring donor chimerism in the peripheral blood (PB) for the duration of 18 weeks posttransplantation (Figure 2B). Consistent with previous reports, analysis of lineage potential between young and old HSCs revealed that old HSCs have a diminished capacity to reconstitute GM, B, and T cells. Similarly, erythroid and Plt chimerism were also lower from old versus young HSCs (Figure 2B).

### Figure 1. Hematopoietic stem cells and megakaryocyte progenitor cells expand during aging

(A) Aging alters the composition of HSCs and classical myeloid progenitors. Gating and representative flow cytometry data of phenotypic HSCs, MPPs, and classical myeloid progenitor populations (phenotypic KLS, CMP, GMP, and MEP) in young and old BM. (B and C) Increased frequencies and total cell numbers of HSCs of old mice compared with young mice. MPP cell percentages and total cell numbers remained the same in young and old mice. Frequencies of CMPs and GMPs remained unchanged while MEPs decreased in frequencies (B), but not numbers (C). The total cell numbers of MyPros, CMPs, and GMPs were significantly increased (C). (D) Aging alters the composition of erythromyeloid progenitors. Gating and representative flow cytometry data of MkPs and additional erythromyeloid progenitor cells (CFU-E, pCFU-E, pGMP, pMegE, “GMP”) in young and old BM. (E and F) Frequency (E) and total cell (F) analysis revealed significantly higher levels of MkPs in the BM of old mice compared with young mice. There was also a slight increase in the frequency and total cell numbers of “GMPs”. (G and H) Alterations in the frequencies (G) and total numbers (H) of circulating platelets, erythroid, and nucleated cells in old mice. Both the frequency and number of PB Plts platelets increased, whereas erythroid cells decreased, upon aging. The frequencies and total numbers of B and T cells decreased in old mice, leading to an increase in the frequency of myeloid cells. Y, Young; O, Old; HSC, hematopoietic stem cells; MPP, multipotent progenitors; KLS, cKit + Lineage-Sca1+ cells; MyPro, myeloid progenitors; CMP, common myeloid progenitors; GMP, granulocyte/macrophage progenitor; MEP, megakaryocyte-erythroid progenitors; MkP, megakaryocyte progenitors; EPs, erythroid progenitor cells; RBCs, red blood cells, GM, granulocytes/myelomonocytes. BM analysis: Young n = 7, Old = 27 in 3 independent experiments. Blood analysis: Young n = 23, Old n = 17 in three independent experiments. Data are shown as mean ± SEM. p values were determined using unpaired two-tailed t test. \*p < 0.05, \*\*p < 0.005, \*\*\*p < 0.0001.

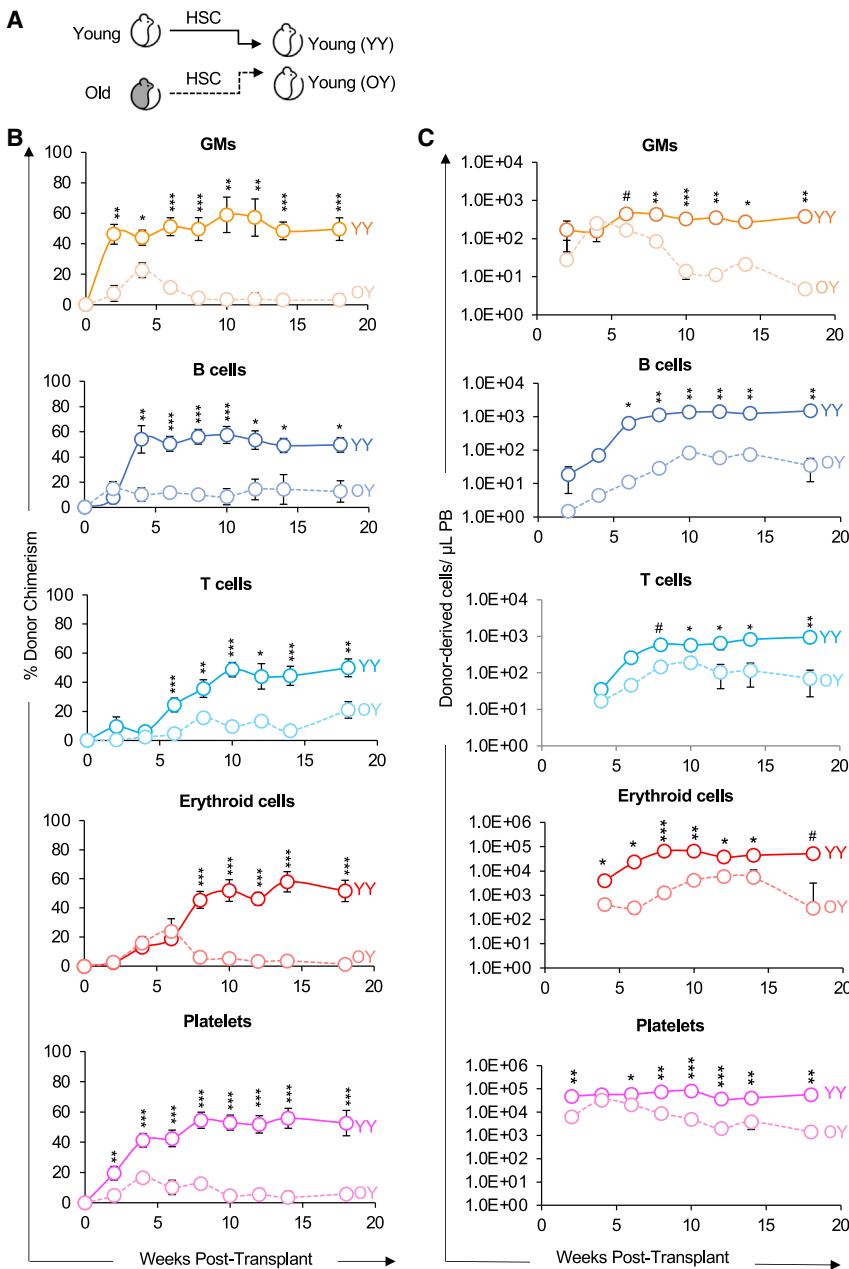

### Figure 2. Old HSCs exhibited impaired reconstitution potential in young recipients

(A) Schematic of transplantation of HSCs from young or old mice into young recipient mice.

(B) Old HSCs contributed to donor-host-chimerism with lower efficiency compared with young HSCs. Analysis of donor-derived mature cells in PB of recipients presented as percent donor chimerism.

(C) Old HSCs produced fewer mature cells compared with young HSCs. Reconstitution data from (B) replotted as absolute numbers of donor-derived GMs, B cells, T cells, erythroid cells, and platelets per microliter of PB.

GM, granulocytes/myelomonocytes. YY, Young HSCs transplanted into young recipients; OY, Old HSCs transplanted into young recipients. Data are representative means  $\pm$  SEM from nine recipient mice of young HSCs (four independent experiments) and 22 recipients of old HSCs (five independent experiments). p values were determined using unpaired two-tailed t test. #p < 0.06, \*p < 0.05, \*\*p < 0.005, \*\*\*p < 0.0005.

Second, we removed the host cell variable by quantifying the absolute numbers of donor-derived mature cells in the PB of recipient mice (Boyer et al., 2019; Cool et al., 2020; Rajendiran et al., 2020a, 2020b) to more quantitatively assess the differences in regenerative activity between young and old HSCs. Old HSCs generated fewer erythroid, GM, B, T, and Plt cells compared with young HSCs (Figure 2C); this observation is consistent with host cell production presented as donor-derived chimerism (Figure 2B). Our data demonstrated a pan-hematopoietic reconstitu-

tion deficit of HSCs during aging, which is consistent with previous reports in white blood cell reconstitution. Taken together, these results also support the notion that key changes intrinsically maintained by HSCs drive their feeble performance upon aging.

### The old bone marrow environment impairs the reconstitution potential of HSCs

We next sought to determine how cues in the aging environment influence HSC reconstitution capacity. Because

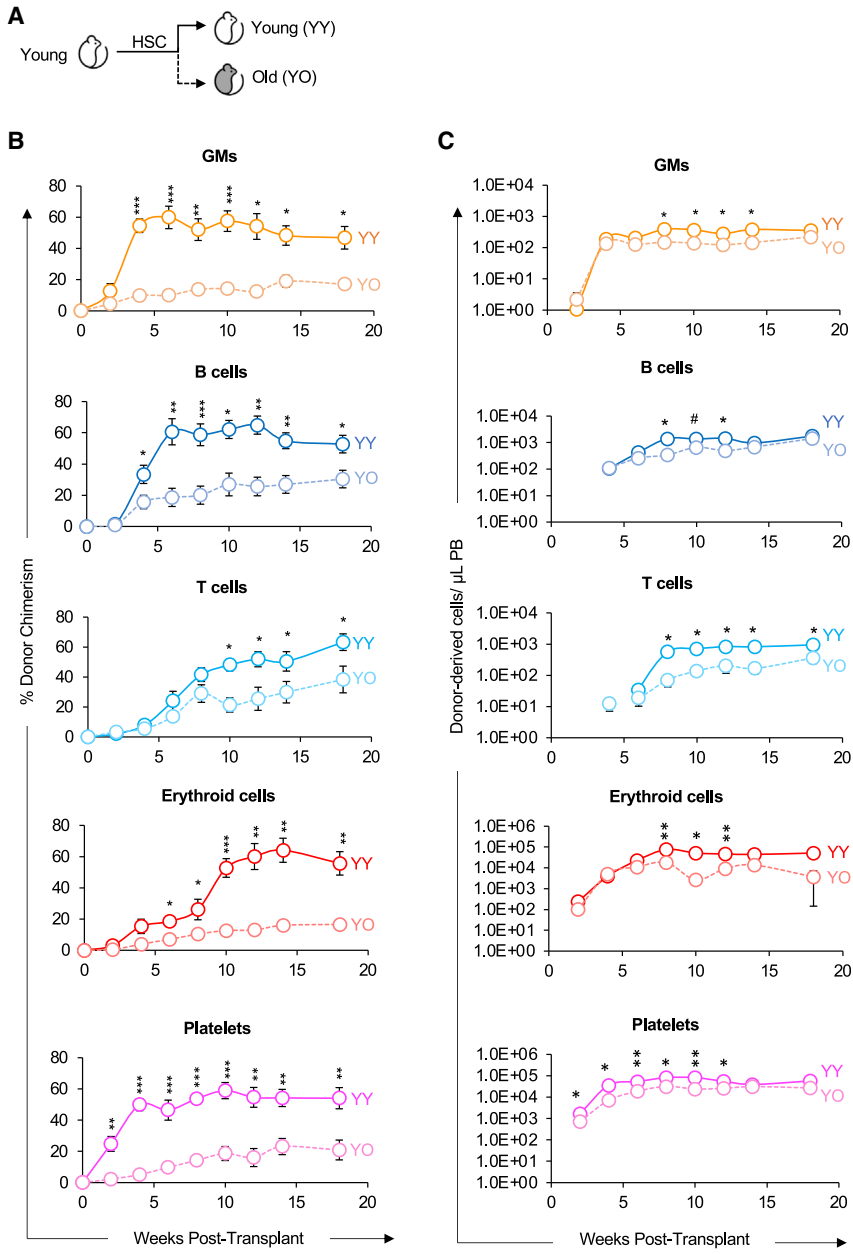

**Figure 3. Young HSCs exhibited lower reconstitution potential in old compared with young recipients**

(A) Schematic of transplantation of HSCs from young mice into separate cohorts of young or old mice.

(B) Old recipients displayed lower HSCs donor-host-chimerism compared with young recipients. Analysis of donor-derived mature cells (GMs, B cells, T cells, erythroid cells, and platelets) in PB of recipients presented as percent donor chimerism.

(C) Donor HSCs produced fewer total mature cells in old recipients compared to in young recipients. Reconstitution data from (B) replotted as absolute number of donor-derived GMs, B cells, T cells, erythroid cells, and platelets per microliter of PB.

YY, Young HSCs transplanted into young recipients; YO, Young HSCs transplanted into old recipients. Data are representative means  $\pm$  SEM from nine young recipient mice (four independent experiments) and 10 old recipient mice (three independent experiments). p values were determined using unpaired two-tailed t test. \* $p < 0.05$ , \*\* $p < 0.005$ , \*\*\* $p < 0.0005$ .

young HSCs outperformed old HSCs in young hosts (Figure 2), we reasoned that young HSCs would engraft with higher efficiency in old compared with young recipients. To test this directly, we purified HSCs from young mice and transplanted them into young or old recipient mice (Figure 3A). We then analyzed mature cell production of transplanted HSCs to quantitatively assess the role of host age on expansion capacity and lineage potential. Young HSCs were capable of long-term, multilineage reconstitution (LTMR) in both young and old hosts. However, in contrast to the young hosts, the old hosts allowed

for significantly lower reconstitution chimerism of HSC-derived GM, B, T, erythroid, and Plt cells (Figure 3B). Overall, the differences were more significant at earlier timepoints (~4–14 weeks) than at later timepoints.

In the same cohorts, we also determined the absolute number of donor-derived mature cells in the PB after transplantation. The donor HSCs in the young host produced greater numbers of donor-derived cells per microliter of PB compared with the old host (Figure 3C). Although this pattern was overall consistent with the patterns observed by donor chimerism, the differences in total cell

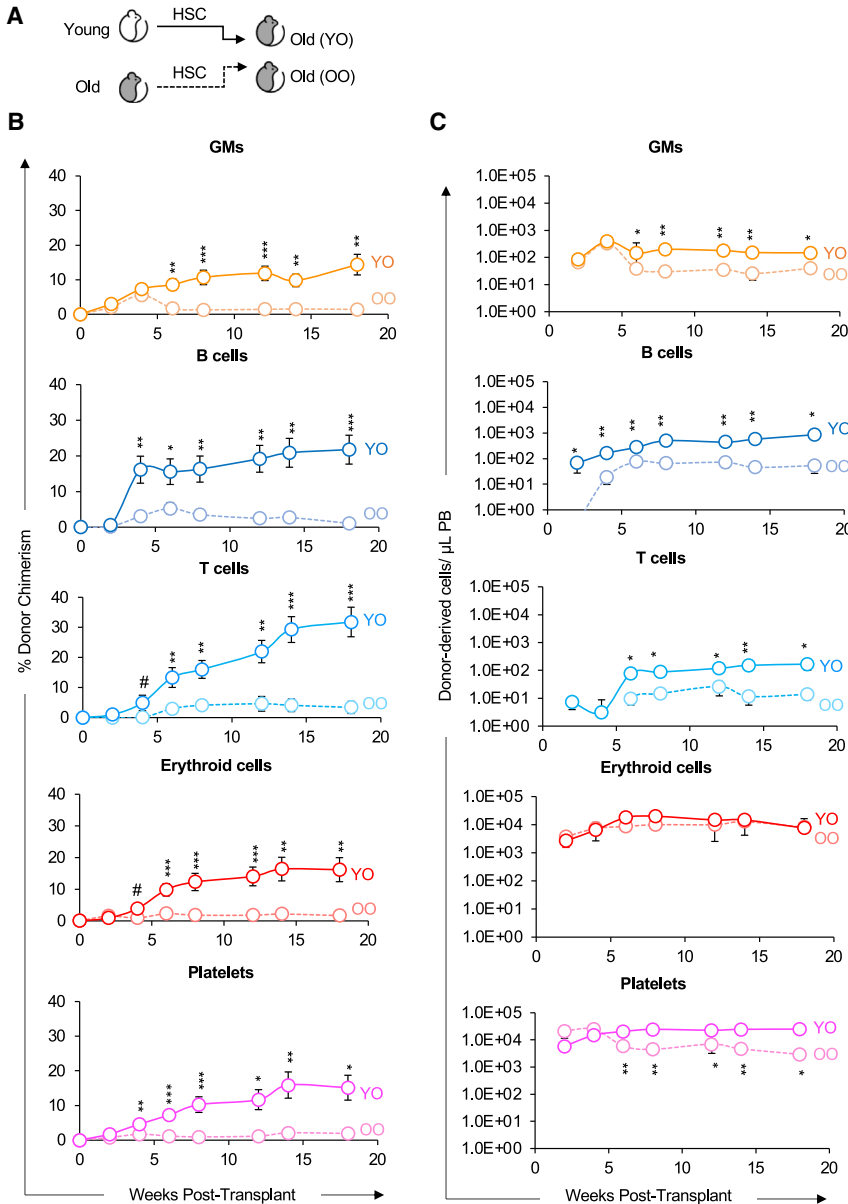

### Figure 4. Old HSCs exhibited impaired reconstitution potential compared to young HSCs in old recipients

(A) Schematic of transplantation of HSCs from young or old mice into separate cohorts of old mice.

(B) Old HSCs displayed lower donor-host-chimerism compared with young HSCs. Analysis of donor-derived mature cells (GMs, B cells, T cells, erythroid cells, and platelets) in PB of recipients presented as percent donor chimerism.

(C) Old HSCs produced fewer total mature cells in old recipients compared with in young HSCs. Reconstitution data from (B) replotted as absolute number of donor-derived GMs, B cells, T cells, erythroid cells, and platelets per microliter of PB.

YO, Young HSCs transplanted into old recipients; OO, Old HSCs transplanted into old recipients. Data are representative means  $\pm$  SEM from 11 recipient mice of young HSCs (four independent experiments) and eight recipients of old HSCs (three independent experiments). p values were determined using unpaired two-tailed t test. \*p < 0.05, \*\*p < 0.005, \*\*\*p < 0.0005.

production was attenuated and, with the exception of T cells, was not sustained over time. This analysis revealed that the old host reduced donor chimerism by young HSCs. However, when we removed the host variable by measuring absolute mature cell production, our analysis revealed a less different reconstitution capacity between young HSCs placed in the young environment and the young HSCs in the old environment.

Because the isochronic Y-into-Y transplants led to higher chimerism than the two heterochronic (O-into-Y or Y-into-O) transplants (Figures 2 and 3), we hypothesized that an old environment would provide a more supportive environment for old HSCs. We therefore compared the recon-

stitution potential of young and old HSCs in an old host (Figure 4A) and assayed for donor chimerism (Figure 4B) and absolute number of donor-derived cells (Figure 4C). Surprisingly, transplantation of young HSCs led to higher reconstitution of old recipients compared with transplantation of old HSCs. We also examined the impact of reconstitution by old HSCs in a young or old environment; our analysis revealed that old HSCs exhibited poor reconstitution capacity in the old host compared with the young host (Figure S1). Therefore, while the aged BM environment impaired the reconstitution potential of transplanted young HSCs (Figure 3), HSCs from old mice performed even worse than young HSCs in an aged environment

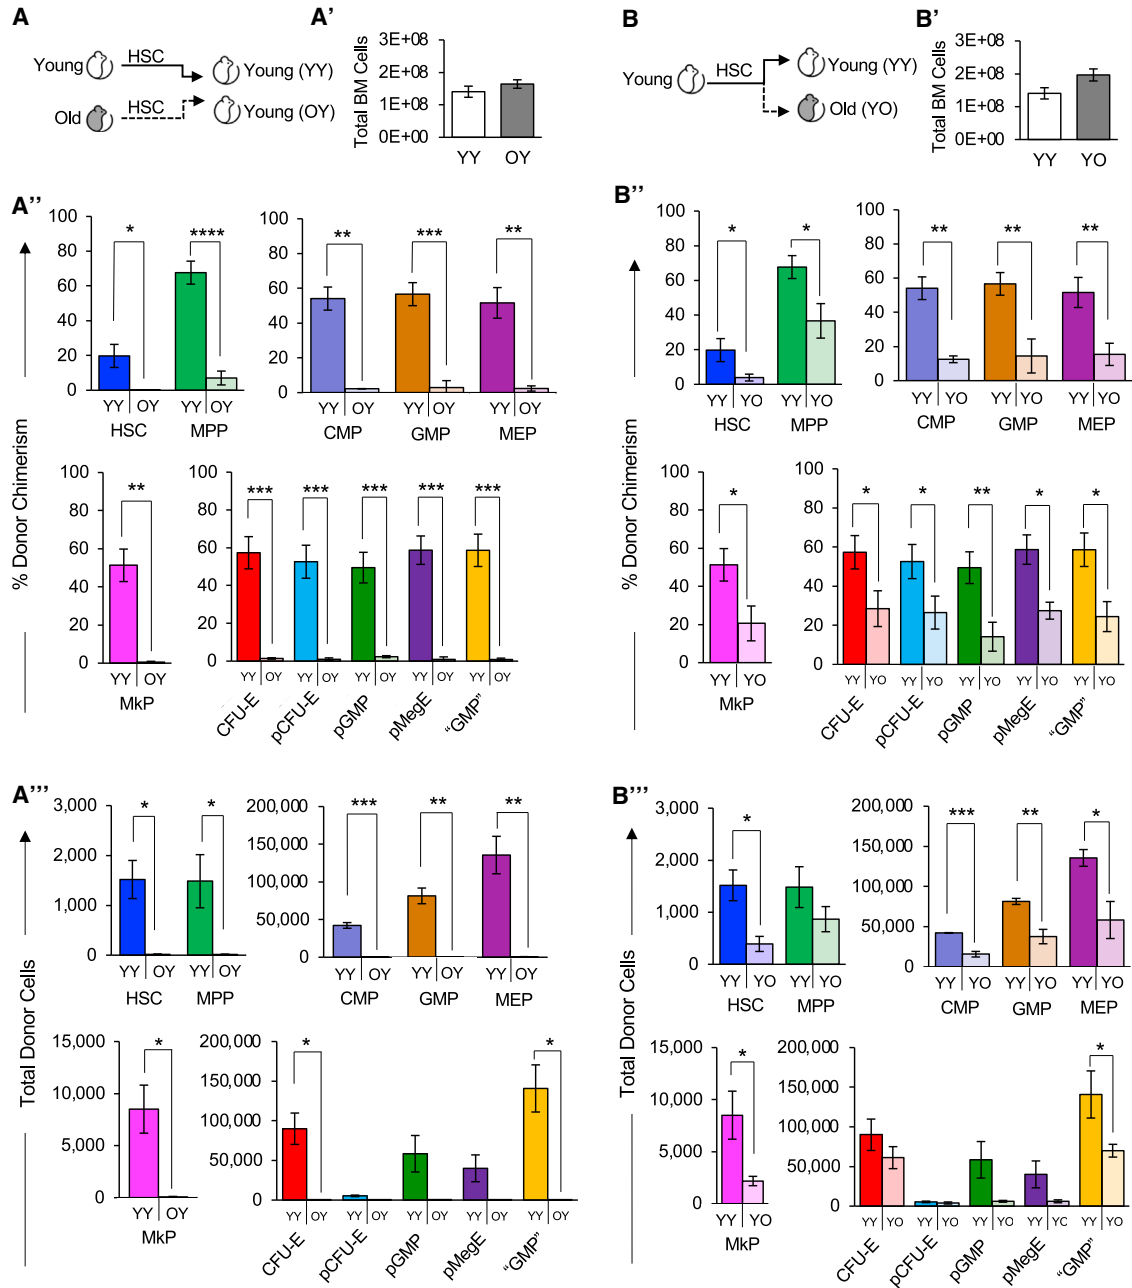

**Figure 5. Both old HSCs and the old niche impaired reconstitution of the stem and progenitor cell compartment**

(A) Schematic of HSC transplantation from young or old mice into young mice.

(A') The total number of BM cells was similar in young recipient mice >16 weeks after transplantation of either young or old HSCs.

(A'') Old HSCs contributed to significantly lower donor-to-host chimerism of BM stem and progenitor cells in young recipient mice compared with young HSCs. Percent donor chimerism of HSPCs and erythromyeloid progenitors in the recipient BM of young or old HSCs >16 weeks posttransplant.

(A''') Old HSCs generated fewer total stem and progenitor cells than young HSCs in young recipient mice. Quantification of total donor-derived classical HSPCs and erythromyeloid progenitors in the BM of recipients >16 weeks posttransplant.

(B) Schematic of HSC transplantation from young mice into separate cohorts of young or old mice.

(B') The total number of BM cells was similar in young and old recipient mice >18 weeks after transplantation of young HSCs.

(B'') Old recipients displayed lower donor-to-host HSPC chimerism than young recipient mice transplanted with young HSCs. BM analysis of young or old mice transplanted with young HSCs. HSPCs were analyzed >18 weeks posttransplant and presented as donor chimerism.

(legend continued on next page)



(Figure 4 and S1). In combination with the diminished reconstitution potential of old HSCs (Figure 2), these results indicate that aging also leads to reduction in HSC-intrinsic performance and in the ability of the BM environment to support transplanted HSCs (Figures 3, 4, and S1).

### Both old HSCs and the old niche impairs reconstitution of the stem and progenitor cell compartment

The reported Plt bias of old HSCs (Grover et al., 2016; Haas et al., 2015; Sanjuan-Pla et al., 2013; Yamamoto et al., 2013, 2018) had the potential to translate into maintained, or even increased, Plt reconstitution by old HSCs, possibly at the expense of the other lineages. However, Plt reconstitution by old HSCs in either young (Figure 2) or old (Figure 4) hosts, and by young HSCs in old hosts (Figure 3) was as impaired as reconstitution of erythroid cells and WBCs. To determine whether the observed reconstitution of the PB is reflected in the BM of the recipients, we also determined the capacity of young and old HSCs to regenerate stem and progenitor cells. In the cohorts analyzed for PB reconstitution in Figures 2 and 3, we determined donor chimerism in the BM stem and progenitor cell compartment >18 weeks posttransplantation (Figure 5A). All expected populations were detected, supporting the LTMR capability of HSCs. Quantitatively, young recipients contained similar total BM cell numbers (Figure 5A') and, in comparison with young HSCs, old HSCs exhibited a much lower capacity to reconstitute classical HSPCs and erythromyeloid progenitor populations, with notably lower contribution to MkP reconstitution (Figure 5A''). Likewise, quantifying the total cell number of donor-derived HSPCs revealed a similar pattern (Figure 5A'''). When determining the role of the aging recipient environment on HSC reconstitution of BM populations (Figures 5B, S2B, and S2B'''), we also found that despite having similar total BM cell numbers (Figures 5B' and S2B'), there were lower frequencies and total numbers of donor-derived classical myeloid progenitor cells and erythromyeloid progenitor populations in the old hosts compared with the young hosts (Figures 5B' and B''). Similar observations were made for the old HSCs in old recipients (Figures 6A and 6A'''). Taken together, our data suggest that aging alters both HSC-intrinsic and recipient properties, and that these age-related changes affect the entire hematopoietic hierarchy and all lineages, including erythro- and megakaryopoiesis.

### Old MkPs were functionally enhanced compared with young MkPs

The most profound and consistent change in old mice was alterations in megakaryopoiesis, denoted by a dramatic increase in MkPs and Plts (Figure 1). However, this age-dependent increase in MkPs was not accompanied by an age-dependent functional bias of HSCs toward the megakaryocyte lineage: transplanted old HSCs were as deficient in MkP (Figures 5A'', 5B'', 5A''', 5B''', 6A'', 6B'', 6A''', and 6B''') and Plt (Figures 2B, 2C, 4B, 4C, S1B, and S1C) reconstitution as they were in generating other lineages. Thus, we hypothesized that the dramatic increase in the frequency and total numbers of old MkPs and Plts (Figures 1D–1H) may be manifested by MkP-intrinsic changes, possibly in addition to increased contribution from the HSC compartment.

To begin to test this hypothesis, we determined functional differences between young and old MkPs *in vitro*. Interestingly, evaluation of MkP proliferative capacity by short-term culture assays revealed a significant, 2.5-fold increase in expansion of old MkPs compared with young MkPs (Figures 7A and 7B). These experiments showed that old MkPs displayed a surprising *increased* functional capacity compared with young MkPs *in vitro*.

### Old MkPs possessed greater platelet reconstitution potential compared with young MkPs

The notable increase in expansion capacity of old MkPs *in vitro* lead us to predict potential functional differences *in vivo*. To determine the reconstitution potential of old MkPs *in vivo*, we transplanted young or old MkPs into young recipient mice (Figure 7C). We evaluated MkP multi-lineage reconstitution in the host by measuring their contribution to mature cells (Plt, erythroid cells, GMs, B, T) in the PB for 16 weeks. Given that young MkPs have been shown to be strongly committed to the Plt lineage in *in vitro* assays (Nakorn et al., 2003; Pronk et al., 2007), we predicted that MkPs would primarily produce Plts. Indeed, young MkPs contributed to nominal donor-chimerism levels of GM, B, and T cells, with a more robust contribution to Plts, as well as, unexpectedly, a short burst of erythroid cells (Figure 7D). Surprisingly, relative to young MkPs, old MkPs exhibited a remarkable capacity to engraft and contribute to Plts in the recipient mice (Figure 7D). Although young MkPs repopulated a more modest 7.4% of Plts, the same number of old MkPs repopulated on average 34% of Plts in the recipient mice. Interestingly,

(B''') Transplanted young HSCs produced fewer total HSPCs in the BM of old compared with young recipient mice. Quantification of total donor-derived HSPC numbers in the BM of recipients >18 weeks posttransplant.

YY, Young HSCs transplanted into young recipients; OY, Old HSCs transplanted into young recipients; YO, Young HSCs transplanted into old recipients. Data are representative means  $\pm$  SEM. PB analysis of the same recipient mice are presented in Figures 2A' and 2A''' and Figure 3B' and 3B'''. p values were determined using unpaired two-tailed t test. \*p  $\leq$  0.05, \*\*p < 0.005, \*\*\*p < 0.0005, \*\*\*\*p < 0.0001.



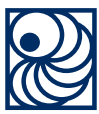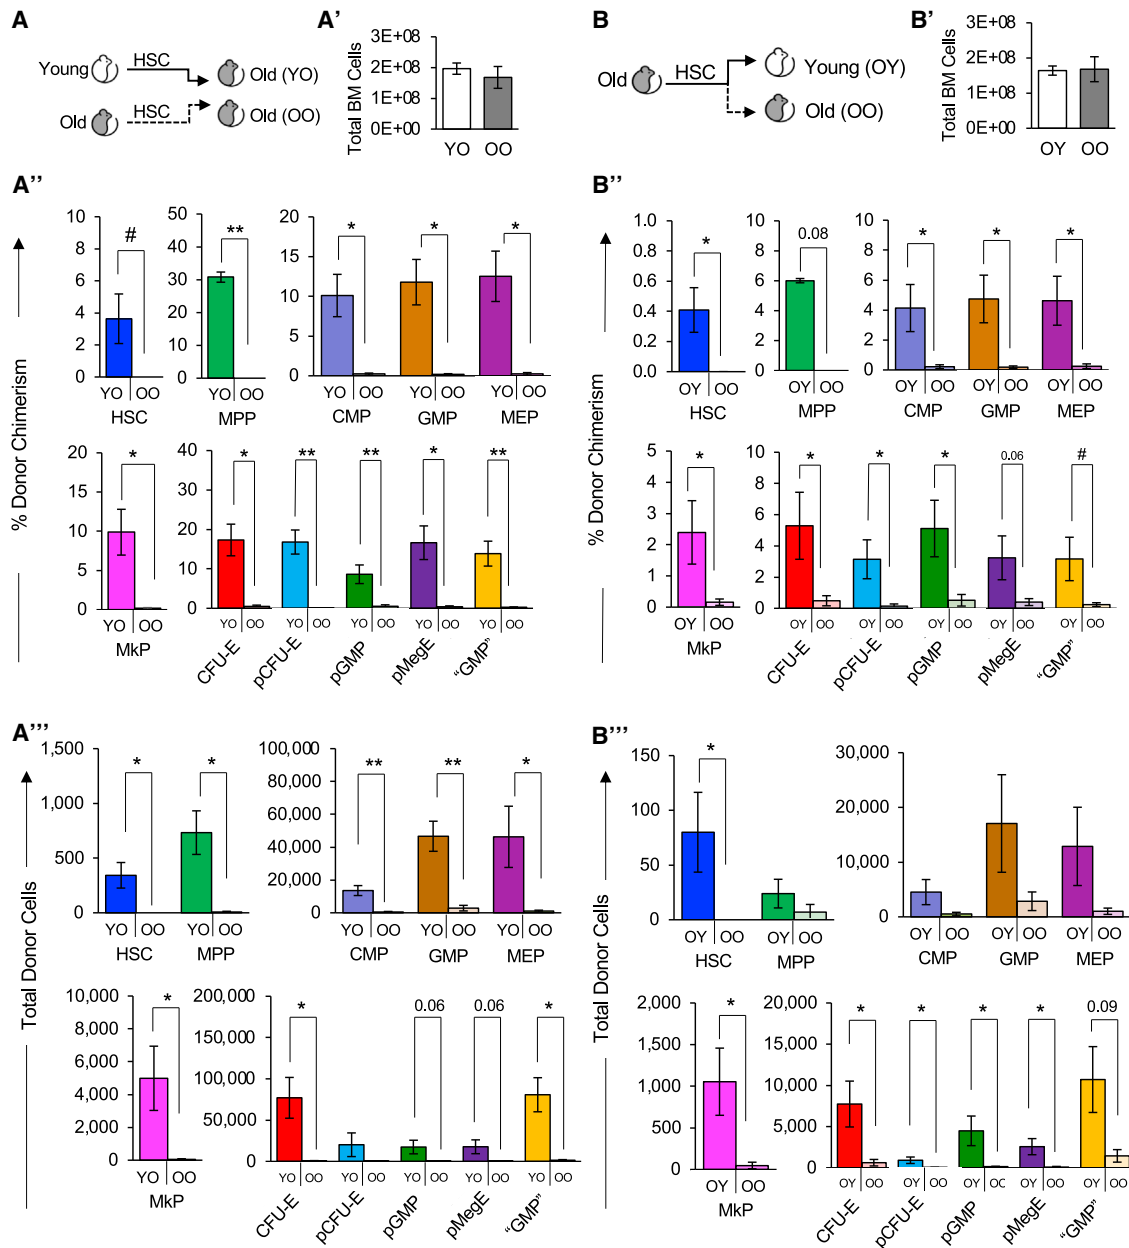

**Figure 6. Stem and progenitor cell reconstitution by old HSCs was impaired and exacerbated by the old niche**

(A) Schematic of transplantation of HSCs from young or old mice into old mice.

(A') Quantification of total BM cells in recipient mice in (A) >16 weeks posttransplant.

(A'') Old HSCs contributed to significantly lower donor-to-host chimerism of BM stem and progenitor cells compared with young HSCs in an old host. Percent donor chimerism of HSPCs and erythromyeloid progenitors in the old recipient BM of transplanted young or old HSCs >16 weeks posttransplant.

(A''') Old HSCs generated fewer total stem and progenitor cells than young HSCs in old recipient mice. Quantification of total donor-derived classical HSPCs and erythromyeloid progenitors in the BM of recipients >16 weeks posttransplant.

(B) Schematic of transplantation of HSCs from old mice into separate cohorts of young or old mice.

(B') Quantification of total BM cells in recipient mice in (B) >16 weeks posttransplant.

(B'') Old recipients displayed lower donor-to-host HSPC chimerism than young recipient mice transplanted with old HSCs. BM analysis of young or old mice transplanted with old HSCs. HSPCs were analyzed >18 weeks posttransplant and presented as donor chimerism.

(legend continued on next page)



old MkPs also contributed to significantly higher erythroid cell and GM chimerism in the recipient mice relative to young MkPs. It is also notable that unlike the long-term reconstitution capacity of HSCs (Figures 2, 3, 4, 5, and 6), the Plt, erythroid cell, and GM production from old MkPs was robust only in the first few weeks posttransplant and then declined over time.

These differences between young and old MkPs were reinforced by quantification of the absolute cell numbers from the same experiments (Figure 7E). The absolute quantification revealed that old MkPs engrafted and produced Plts, as well as erythroid cells and GMs, at a remarkably high efficiency compared with young MkPs. Taken together, our *in vitro* and *in vivo* results indicated that MkPs gain both expansion and reconstitution capacity during aging.

### RNA-sequencing revealed different molecular patterns between young and old MkPs

We were surprised by the remarkable difference in expansion and reconstitution capacity between young and old MkPs. To test how aging affects the molecular profile of MkPs, we evaluated the molecular regulation of old MkPs by performing RNA-sequencing (RNA-seq) analysis of young and old MkPs. We found that young and old MkPs had very similar gene expression profiles as expected of two MkP populations, sharing over 15,000 transcripts. Importantly, we also identified 520 differentially expressed genes between young and old MkPs, 237 of which were downregulated and 283 were upregulated in old MkPs (Figure 7F). Hierarchical clustering of seven independent samples showed that independent biological replicates associated based on age, as expected (Figure 7G), with the top 50 differentially expressed genes shown as a heatmap (Figure 7G and Table S1).

To further evaluate the expression signatures of young and old MkPs, we performed Gene Ontology (GO) analysis. This analysis indicated that differentially expressed genes between young and old MkPs were highly enriched in categories related to proliferation (Figure 7H), inferring intrinsic regulation of the observed enhanced expansion capacity of old MkPs (Figures 7A–7E). Other GO terms associated with the differentially expressed genes included cell adhesion, inflammation, and mitochondrial regulation (Figure 7H). The latter is consistent with a recent publication of mitochondrial activity playing a role in age-related Plt function (Davizon-Castillo et al., 2019). Genes under

each GO term are presented in Table S2. At the gene level, we observed both novel and well-known regulators of hematopoiesis and hematological processes (Figures 7G and 7I). For example, we identified regulators of lineage specification, including *Csf1* and *Tcf3* (also known as E2A) (Semerad et al., 2009; Stanley and Chitu, 2014). Also, previously described regulators of megakaryocyte differentiation were differentially expressed. These genes include *Prmt1*, *Selp*, and *Tesc*, a regulator of E26 transformation-specific (ETS) transcription factors (Banu et al., 2020; Jin et al., 2018; Levay and Slepak, 2007). We also observed differential expression of multiple genes associated with Plt regulation, production, and function: Coagulation Factor X, *Dtnbp1*, *Gfi1b*, *Enpp4*, *Pafah1b3*, *Pafah1b1*, *Mmm1*, and *Selplg*. Mutations in *Gfi1b* and *Dtnbp1* are associated with various Plt disorders and bleeding disorders (Ghani and Dell'Angelica, 2011; Songdej and Rao, 2017). Interestingly, our analysis also revealed a small subset of upregulated genes previously implicated in acute myeloid leukemia (AML), including *Pbx3*, *Lair1*, and *Mllt3* (Kang et al., 2015; Li et al., 2013; Marschalek, 2010), and is possibly linked to increased risk of AML in the elderly (Almeida and Ramos, 2016).

The results of the RNA-seq analysis corroborates the behaviors observed in our functional analyses of MkPs. Together, these data illuminate the fundamental difference between youthful and aging megakaryopoiesis. Importantly, our RNA-seq data revealed well-known genes implicated in the molecular mechanisms of megakaryopoiesis during aging, as well as a number of novel genes that can be pursued to understand, and possibly mitigate, the age-related changes that occur in megakaryopoiesis.

## DISCUSSION

### Aging alters the reconstitution potential of HSCs

As previously reported by others, our characterization of the old BM populations revealed an expansion of HSCs, accompanied by alterations to descendant mature cells in the PB (Figure 1). These observations raised the need understand how HSC differentiation is modulated by the balance of both intrinsic changes to HSCs and extrinsic influence on HSCs during aging. Young HSCs have been suggested to have superior engraftment and reconstitution capacity compared with old HSCs (Dykstra et al., 2011; Morrison et al., 1996; Rossi et al., 2005; Sudo et al., 2000). Indeed,

(B''') Transplanted old HSCs produced fewer total HSPCs in the BM of old compared with young recipient mice. Quantification of total donor-derived HSPC numbers in the BM of recipients >18 weeks posttransplant.

YO, Young HSCs transplanted into old recipients; OO, Old HSCs transplanted into old recipients; OY, Old HSCs transplanted into young recipients. Data are representative means  $\pm$  SEM. PB analysis of the same recipient mice are presented in Figures 4A' and A''' and S1B' and S1B'''. p values were determined using unpaired two-tailed t test. \*p  $\leq$  0.05, \*\*p < 0.005, \*\*\*p < 0.0005, \*\*\*\*p < 0.0001.

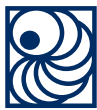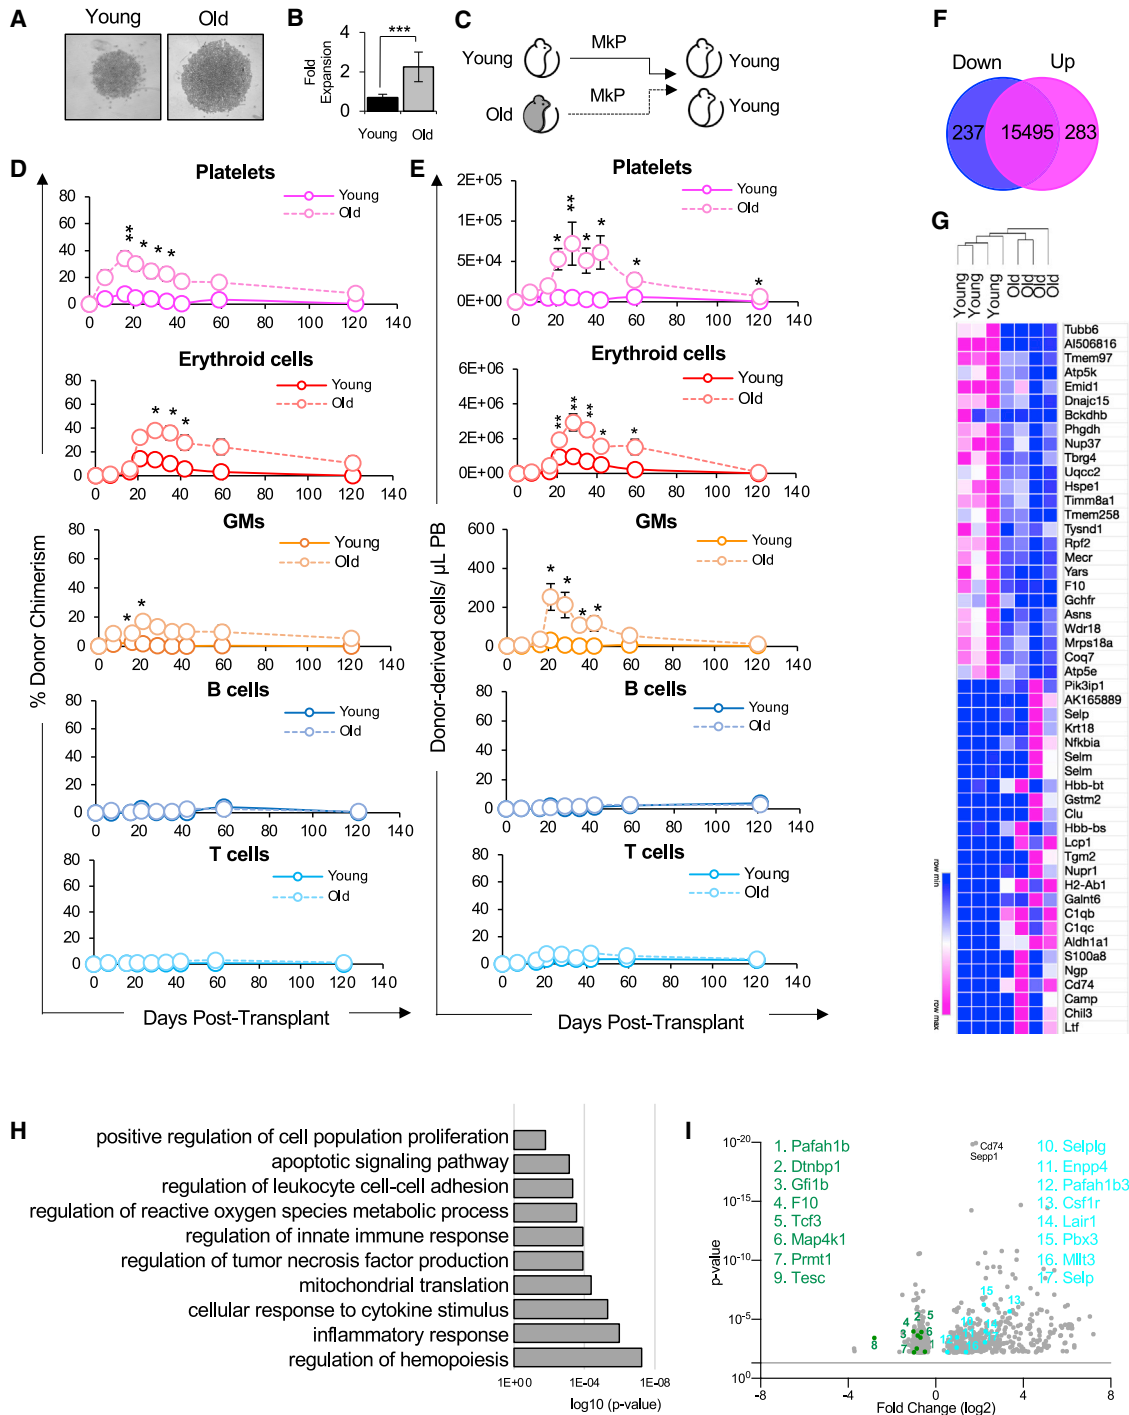

**Figure 7. Old MkPs had enhanced reconstitution potential and altered gene expression signatures compared with young MkPs**

(A and B) Old MkPs have enhanced proliferative capacity compared to young MkPs *in vitro*. (A) Representative images of Y and O MkPs grown *in vitro*. To evaluate proliferative capacity, 2,000 MkPs were FACS sorted from young and old mice and grown in liquid culture. Three days after seeding, MkPs were microscopically evaluated for expansion efficiency. (B) MkP expansion *in vitro*. Flow cytometry was used to quantify the total fold expansion of cultured young and old MkPs from (A).  $n = 3$  from three independent experiments. (C) Schematic of transplantation of young or old MkP into young mice.

(legend continued on next page)



our experiments transplanting young or old HSCs indicated that old HSCs exhibited a diminished reconstitution capacity (Figures 2 and 5). To address whether the reduced reconstitution activity of HSCs during aging is influenced by the aged environment, we transplanted young HSCs into young or old hosts (Figures 3 and 5). Our data revealed that the old environment was less supportive of reconstitution by transplanted HSCs compared with the young environment. Therefore, transplanted young HSCs did not have an obvious competitive advantage over the resident old HSCs in the aged host. Notably, transplanted old HSCs had even lower capacity to reconstitute the old host compared with young HSCs (Figures 4 and 6), demonstrating that the poor performance of old HSCs in young recipients (Figures 2 and 5) was not due to the age-mismatch (heterochronic) between donor and host.

Because both young and old HSCs perform worse in old compared with young recipients, it is clear that age-related changes in the host impact donor HSC performance. This could be related to the reported increased proliferation of old HSCs (Kirschner et al., 2017), age-related changes to the distal and local microenvironment, or both. Our collective iso- and heterochronic transplantation data show that both HSC-intrinsic and extrinsic mechanisms during aging affect reconstitution efficiency (SanMiguel et al., 2020). Interestingly, we did not detect a selective retention of MkP or Plt reconstitution capacity of transplanted old HSCs, despite the increased frequencies and numbers of HSCs, MkPs, and Plts in unmanipulated aged mice (Figure 1). It remains possible that HSCs contribute to the greater production of MkPs *in situ* (Carrelha et al., 2018), with participation of the aging BM microenvironment (Ho et al., 2019). Together with the observed expansion of HSCs *in situ* (Figure 1), our transplantation results sug-

gest that the impaired reconstitution performance of aged HSCs reflects reduced engraftment capacity rather than functional decline *in situ*. A better understanding of how young and old BM cells respond to niche-clearing methods could help to develop optimal systems for investigating reconstitution differences between young and old HSCs, and between young and old recipients.

### Surprising reconstitution and differentiation potential of old MkPs

Our data provided evidence about the changes to the homeostatic control of blood cell production at the MkP level of hematopoietic differentiation during aging. Given the reconstitution deficit displayed by old HSCs (Figures 2, 4, 5A, and 5A<sup>'''</sup>), one might have expected that old MkPs would also display functional deficiencies. We were surprised to find from our *in vitro* experiments that old MkPs displayed greater proliferative potential (Figures 7A and 7B). Strikingly, we also observed from transplanting young and old MkPs that old MkPs harbored a remarkable capacity to engraft, expand, and reconstitute Plts (Figures 7C–7E). This age-associated elevation of MkP potential is reminiscent of the higher prevalence of thrombosis and other cardiovascular problems in the elderly. We hypothesize that age-related alterations made to MkP populations contribute to dysregulation and increased risk for age-related morbidities (Davizon-Castillo et al., 2019).

Our transplantation studies of old and young MkPs also revealed somewhat surprising evidence about the differentiation programs of immature progenitors during aging (Figures 7C–7E). Previous reports suggested that young MkPs are exclusively associated with megakaryocyte and Plt generation (Nakorn et al., 2003; Pronk et al., 2007). However, those conclusions were primarily based on

(D) Old MkPs demonstrated greater short-term contribution to platelet donor-to-host chimerism in the recipient mice compared to young MkPs. Old MkPs also contributed to short-term erythroid cells and GM donor-to-host chimerism, but not to B or T cells. Analysis of donor-derived mature cells (platelets, erythroid cells, GMs, B cells, T cells) in PB of recipients presented as percent donor chimerism.

(E) Old MkPs generated higher numbers of platelets compared with young MkPs in recipient mice. Old MkPs also produced more erythroid cells and GMs compared with young MkPs. Reconstitution data replotted as absolute numbers of donor-derived platelets, erythroid cells, GMs, B cells, and T cells per microliter of PB.

(F) RNA-seq analysis revealed transcriptional changes accompanying aging of the MkP compartment. A total of 237 genes were downregulated and 283 genes were upregulated in old MkPs. A Venn diagram showing the numbers of downregulated (blue) and upregulated (pink) differentially expressed genes (DEGs) in old versus young MkPs.

(G) Hierarchical clustering analysis confirmed the distinct gene expression characteristics of the young and old MkPs. Heatmap showing the scaled expression of the top 50 DEGs in young and old MkP clusters. Pink and blue indicate comparatively high and low expression, respectively.

(H) The expression patterns associated with aging MkPs revealed changes to important biological functions. Major GO biological process terms in which DEGs enriched for.

(I) Identifying specific DEGs highlights known and novel regulators of aging megakaryopoiesis. A volcano plot of DEGs between young and old MkPs. Genes described in text are highlighted.

Data in (A–E) are representative means  $\pm$  SEM. Data from transplantation experiments are from five recipient mice of young MkPs and 11 recipient mice of old MkPs from at least three independent experiments. p values were determined by unpaired two-tailed Student's t test \*p < 0.05, \*\*p < 0.005, \*\*\*p  $\leq$  0.001.



transcription profiles and *in vitro* differentiation capacity, with no direct assessment of differentiation potential *in vivo*. We recently reported that classically (Akashi et al., 2000) and alternatively (Pronk et al., 2007) defined GMPs produce erythroid cells *in vivo*. This fits a model where erythropoiesis is a default HSC fate (Boyer et al., 2019). Under that model, it is not surprising that our experiments revealed that both young and old MkPs harbor *in vivo* erythroid capacity. Surprisingly, old MkPs also demonstrated greater capacity for the GM lineage compared with young MkPs. It is possible that our observations may be a result of poorly defined cellular phenotypes in old mice, raising the question of how aging might affect the immunophenotype of MkPs. Given that several markers are shared between MkPs and HSCs (Zhu et al., 2019), with a gain of CD41 expression as HSCs age (Gekas and Graf, 2013), the possibility that the MkP compartment in old BM contains significant numbers of HSCs was considered. However, old MkPs lacked B and T cell generation and the enhanced production of Plts, erythroid cells, and GMs did not persist long-term, unlike that of multipotent and self-renewing HSCs. Additionally, we did not observe any age-related differences in expression of megakaryopoiesis master regulators such as *Fli1*, *Gabpa*, *Mpl*, *Pf4*, and *Runx1* (Bruns et al., 2014; De Sauvage et al., 1994; Doré and Crispino, 2011; Elagib et al., 2003; Kaushansky et al., 1994; Klimchenko et al., 2009; Zhu et al., 2018) (Figure 7). A high similarity between these genes suggest high purity of the MkP populations. Together, these findings indicate that the high expansion and oligopotency of old MkPs by transient production of Plts, erythroid cells, and GMs cannot be explained by contaminating HSCs, but rather due to enhanced potential in the aged MkP compartment.

### Aging is associated with changes in MkP genome-wide expression signatures

Our transcriptome data provide important clues about the intrinsic molecular regulation of megakaryopoiesis during aging (Figure 7). RNA-seq analysis of young and old HSCs has provided a paradigm of molecular switches during ontogeny (Cabezas-Wallscheid et al., 2014; Grover et al., 2016; Kowalczyk et al., 2015; Sanjuan-Pla et al., 2013; Sun et al., 2014). Similarly, our data showed that young and old MkPs have different gene expression programs, reflecting divergence in the molecular control of Plt differentiation during aging. For example, differential expression of genes involved in proliferation reinforced the differences in proliferative capacity between young and old MkPs. The expansion of MkPs with age also suggest that MkPs themselves may serve as a reservoir for mutations promoting clonal progression to cardiovascular diseases and cancer (Pardali et al., 2020; Steensma and Ebert, 2020). In line with this model, we observed age-related in-

crease in expression of genes involved in AML. Moreover, different transcriptional networks involving Plt function were observed between young and old MkPs, supporting a model in which MkPs propagate events toward age-related dysregulation of Plt biology. An important next step will be to identify key molecular regulators that cause or are a consequence of age-related changes to megakaryopoiesis.

In conclusion, our data revealed that profound perturbations in homeostatic control underlie megakaryopoiesis during the aging process. Given that HSCs gradually lose their regenerative potential during aging, it is reasonable to focus research on the HSC contribution to aging. There remains, however, a conceptual gap in the role of altered progenitor cells as potential perpetrators of aging. Our findings shed light on the mechanisms of aging within the Plt lineage that may dictate the etiology of Plt-related disorders, and other myeloid diseases that may be operating through committed progenitors rather than HSCs. Our study sets the stage for further exploration of mechanisms governing youthful and aging megakaryopoiesis and suggests that progenitor cell involvement should be considered when investigating normal and pathophysiological changes in the hematopoietic system during aging.

## EXPERIMENTAL PROCEDURES

### Mouse lines

All animals were housed and bred in the Association for Assessment and Accreditation of Laboratory Animal Care-accredited vivarium at UC Santa Cruz and maintained under approved Institutional Animal Care and Use Committee guidelines. Young adult mice were used between 8 and 16 weeks of age and old adult mice were 20+ months of age. Old recipient mice in transplantation experiments were 18+ months of age. All mice were randomized based on sex.

### HSC and MkP isolation and analysis by flow cytometry

BM stem and progenitor cell populations and mature cell subsets were prepared and stained as previously described (Beaudin et al., 2014, 2016; Leung et al., 2019; Martin et al., 2021; Smith-Berdan et al., 2015, 2019; Ugarte et al., 2015). HSCs or MkPs from young or old mice were prospectively isolated using a fluorescence-activated cell sorting (FACS) Aria III (Becton Dickinson, San Jose, CA) as previously described (Boyer et al., 2019; Leung et al., 2019; Martin et al., 2021).

### Transplantation reconstitution assays

Reconstitution assays were performed by transplanting double-sorted HSCs (200 per recipient) from young or old Ubc-GFP<sup>+</sup> whole BM and transplanting into congenic C57BL/6 mice via retro-orbital intravenous transplant. We also transplanted double-sorted MkPs (22,000 per recipient) from C57BL/6 into Ubc-GFP<sup>+</sup> hosts. Hosts were preconditioned with sub-lethal radiation (~750 rads) using a Faxitron CP160 X-ray instrument (Precision Instruments).



## RNA-seq

The RNA-seq libraries were generated by sorting MkPs from young or old C57BL/6 mice using FACS Aria III (Becton Dickinson). Cells were stored in Trizol (Invitrogen) at  $-80^{\circ}\text{C}$  until RNA isolation. RNA-seq libraries were generated using Nextera Library Prep, as we have previously done (Beaudin et al., 2016; Byrne et al., 2017). Libraries were validated using the Bioanalyzer (Agilent 2100), validated RNA-seq libraries were sequenced using Illumina HiSeq 4000 as Paired-end run reads at the QB3-Berkeley Genomics at University of California Berkeley, and DESeq analysis was done with the help of Dr. Sol Katzman at the UCSC Bioinformatics Core. Heatmap was generated using Morpheus, <https://software.broadinstitute.org/morpheus>. Go Term analysis was run using Panther.

## Quantification and statistical analysis

Number of experiments,  $n$ , and what  $n$  represents can be found in the legend for each figure. Statistical significance was determined by two-tailed unpaired Student's  $t$  test. All data are shown as mean  $\pm$  standard error of the mean (SEM) representing at least three independent experiments.

## Data and code availability

The datasets generated in the current study are available in the Gene Expression Omnibus, accession number GEO: GSE166704.

## SUPPLEMENTAL INFORMATION

Supplemental information can be found online at <https://doi.org/10.1016/j.stemcr.2021.04.016>.

## AUTHOR CONTRIBUTIONS

D.M.P. and E.C.F. conceived of the project, designed experiments, and co-wrote the manuscript. D.M.P., A.K.W., and S.S.-B. performed experiments, analyzed data, and edited the manuscript. The authors have no competing financial interests.

## ACKNOWLEDGMENTS

We thank Dr. Anne Brunet for reagents and the UCSC Flow Cytometry Core Facility for technical assistance. This work was funded by an NIH NIA Award (R01AG062879) to E.C.F.; by an NIH IMSD Training Grant (2R25GM058903-18), a Howard Hughes Medical Institute Gilliam Fellowship Award, and an American Heart Association Predoctoral Fellowship Award to D.M.P.; by an NIH NHLBI F31 Fellowship Award and a Tobacco-Related Disease Research Program Predoctoral Fellowship Award to A.K.W.; and by CIRM Shared Stem Cell Facilities (CL1-00506) and CIRM Major Facilities (FA1-00617-1) awards to UCSC.

Received: October 3, 2020

Revised: April 23, 2021

Accepted: April 23, 2021

Published: May 20, 2021

## REFERENCES

- Akashi, K., Traver, D., Miyamoto, T., and Weissman, I.L. (2000). A clonogenic common myeloid progenitor that gives rise to all myeloid lineages. *Nature* *404*, 193–197.
- Almeida, A.M., and Ramos, F. (2016). Acute myeloid leukemia in the older adults. *Leuk. Res. Rep.* *6*, 1–7.
- Banu, A.N., Avraham, S., and Karsenty, H. (2020). Regulates murine megakaryocytopoiesis P-selectin, and not E-selectin, negatively. *J. Immunol. Ref* *169*, 4579–4585.
- Beaudin, A.E., Boyer, S.W., and Forsberg, E.C. (2014). Flk2/Flt3 promotes both myeloid and lymphoid development by expanding non-self-renewing multipotent hematopoietic progenitor cells. *Exp. Hematol.* *42*, 218–229.e4.
- Beaudin, A.E., Boyer, S.W., Perez-Cunningham, J., Hernandez, G.E., Derderian, S.C., Jujavarapu, C., Aaserude, E., MacKenzie, T., and Forsberg, E.C. (2016). A transient developmental hematopoietic stem cell gives rise to innate-like B and T cells. *Cell Stem Cell* *19*, 768–783.
- Boyer, S.W., Rajendiran, S., Beaudin, A.E., Smith-Berdan, S., Muthuswamy, P.K., Perez-Cunningham, J., Martin, E.W., Cheung, C., Tsang, H., Landon, M., et al. (2019). Clonal and quantitative in vivo assessment of hematopoietic stem cell differentiation reveals strong erythroid potential of multipotent cells. *Stem Cell Reports* *12*, 801–815.
- Bruns, I., Lucas, D., Pinho, S., Ahmed, J., Lambert, M.P., Kunisaki, Y., Scheiermann, C., Schiff, L., Poncz, M., Bergman, A., et al. (2014). Megakaryocytes regulate hematopoietic stem cell quiescence through CXCL4 secretion. *Nat. Med.* *20*, 1315–1320.
- Byrne, A., Beaudin, A.E., Olsen, H.E., Jain, M., Cole, C., Palmer, T., DuBois, R.M., Forsberg, E.C., Akeson, M., and Vollmers, C. (2017). Nanopore long-read RNAseq reveals widespread transcriptional variation among the surface receptors of individual B cells. *Nat. Commun.* *8*, 16027.
- Cabezas-Wallscheid, N., Klimmeck, D., Hansson, J., Lipka, D.B., Reyes, A., Wang, Q., Weichenhan, D., Lier, A., Von Paleske, L., Renders, S., et al. (2014). Identification of regulatory networks in HSCs and their immediate progeny via integrated proteome, transcriptome, and DNA methylome analysis. *Cell Stem Cell* *15*, 507–522.
- Carrelha, J., Meng, Y., Kettyle, L.M., Luis, T.C., Norfo, R., Alcolea, V., Boukarabila, H., Grasso, F., Gambardella, A., Grover, A., et al. (2018). Hierarchically related lineage-restricted fates of multipotent haematopoietic stem cells. *Nature* *554*, 106–111.
- Cool, T., Worthington, A., Poscablo, D., Hussaini, A., and Forsberg, E.C. (2020). Interleukin 7 receptor is required for myeloid cell homeostasis and reconstitution by hematopoietic stem cells. *Exp. Hematol.* *90*, 39–45.e3.
- Davizon-Castillo, P., McMahon, B., Aguila, S., Bark, D., Ashworth, K., Allawzi, A., Campbell, R.A., Montenont, E., Nemkov, T., D'Alessandro, A., et al. (2019). TNF- $\alpha$ -driven inflammation and mitochondrial dysfunction define the platelet hyperreactivity of aging. *Blood* *134*, 727–740.
- Doré, L.C., and Crispino, J.D. (2011). Transcription factor networks in erythroid cell and megakaryocyte development. *Blood* *118*, 231–239.

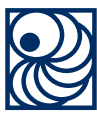

- Dykstra, B., Olthof, S., Schreuder, J., Ritsema, M., and Haan, G. De (2011). Clonal analysis reveals multiple functional defects of aged murine hematopoietic stem cells. *J. Exp. Med.* *208*, 2691–2703.
- Elagib, K.E., Racke, F.K., Mogass, M., Khetawat, R., Delehanty, L.L., and Goldfarb, A.N. (2003). RUNX1 and GATA-1 coexpression and cooperation in megakaryocytic differentiation. *Blood* *101*, 4333–4341.
- Elias, H.K., Bryder, D., and Park, C.Y. (2017). Molecular mechanisms underlying lineage bias in aging hematopoiesis. *Semin. Hematol.* *54*, 4–11.
- Ergen, A.V., Boles, N.C., and Goodell, M.A. (2012). Rantes/Ccl5 influences hematopoietic stem cell subtypes and causes myeloid skewing. *Blood* *119*, 2500–2509.
- Gekas, C., and Graf, T. (2013). CD41 expression marks myeloid-biased adult hematopoietic stem cells and increases with age. *Blood* *121*, 4463–4472.
- Ghiani, C.A., and Dell'Angelica, E.C. (2011). Dysbindin-containing complexes and their proposed functions in brain: from zero to (too) many in a decade. *ASN Neuro* *3*, 109–124.
- Grover, A., Sanjuan-Pla, A., Thongjuea, S., Carrelha, J., Giustacchini, A., Gambardella, A., Macaulay, I., Mancini, E., Luis, T.C., Mead, A., et al. (2016). Single-cell RNA sequencing reveals molecular and functional platelet bias of aged haematopoietic stem cells. *Nat. Commun.* *7*, 1–12.
- De Haan, G., and Van Zant, G. (1999). Dynamic changes in mouse hematopoietic stem cell numbers during aging. *Blood* *93*, 3294–3301.
- Haas, S., Hansson, J., Klimmeck, D., Loeffler, D., Velten, L., Uckelmann, H., Wurzer, S., Prendergast, Á.M., Schnell, A., Hexel, K., et al. (2015). Inflammation-induced emergency megakaryopoiesis driven by hematopoietic stem cell-like megakaryocyte progenitors. *Cell Stem Cell* *17*, 422–434.
- Hamanaka, S., Oeohara, J., Morita, Y., Ema, H., Takahashi, S., Miyawaki, A., Otsu, M., Yamaguchi, T., Onodera, M., and Nakauchi, H. (2013). Generation of transgenic mouse line expressing Kusabira Orange throughout body, including erythrocytes, by random segregation of provirus method. *Biochem. Biophys. Res. Commun.* *435*, 586–591.
- Ho, Y.H., del Toro, R., Rivera-Torres, J., Rak, J., Korn, C., García-García, A., Macías, D., González-Gómez, C., del Monte, A., Wittner, M., et al. (2019). Remodeling of bone marrow hematopoietic stem cell niches promotes myeloid cell expansion during pre-mature or physiological aging. *Cell Stem Cell* *25*, 407–418.e6.
- Jin, S., Mi, Y., Song, J., Zhang, P., and Liu, Y. (2018). PRMT1-RBM15 axis regulates megakaryocytic differentiation of human umbilical cord blood CD34+ cells. *Exp. Ther. Med.* *15*, 2563–2568.
- Kang, X., Lu, Z., Cui, C., Deng, M., Fan, Y., Dong, B., Han, X., Xie, F., Tyner, J.W., Coligan, J.E., et al. (2015). The ITIM-containing receptor LAIR1 is essential for acute myeloid leukaemia development. *Nat. Cell Biol.* *17*, 665–677.
- Kaushansky, K., Lok, S., Holly, R.D., Broudy, V.C., Lin, N., Bailey, M.C., Forstrom, J.W., Buddle, M.M., Oort, P.J., Hagen, F.S., et al. (1994). Promotion of megakaryocyte progenitor expansion and differentiation by the c-Mpl ligand thrombopoietin. *Nature* *369*, 568–571.
- Kirschner, K., Chandra, T., Kiselev, V., Flores-Santa Cruz, D., Macaulay, I.C., Park, H.J., Li, J., Kent, D.G., Kumar, R., Pask, D.C., et al. (2017). Proliferation drives aging-related functional decline in a subpopulation of the hematopoietic stem cell compartment. *Cell Rep.* *19*, 1503–1511.
- Klimchenko, O., Mori, M., DiStefano, A., Langlois, T., Larbret, F., Lecluse, Y., Feraud, O., Vainchenker, W., Norol, F., and Debili, N. (2009). A common bipotent progenitor generates the erythroid and megakaryocyte lineages in embryonic stem cell-derived primitive hematopoiesis. *Blood* *114*, 1506–1517.
- Kowalczyk, M.S., Tirosh, I., Heckl, D., Rao, T.N., Dixit, A., Haas, B.J., Schneider, R.K., Wagers, A.J., Ebert, B.L., and Regev, A. (2015). Single-cell RNA-seq reveals changes in cell cycle and differentiation programs upon aging of hematopoietic stem cells. *Genome Res.* *25*, 1860–1872.
- Leung, G.A., Cool, T., Valencia, C.H., Worthington, A., Beaudin, A.E., and Camilla Forsberg, E. (2019). The lymphoid-associated interleukin 7 receptor (IL7R) regulates tissue-resident macrophage development. *Development* *146*, dev176180.
- Levy, K., and Slepak, V.Z. (2007). Tescalcin is an essential factor in megakaryocytic differentiation associated with Ets family gene expression. *J. Clin. Invest.* *117*, 2672–2683.
- Li, Z., Zhang, Z., Li, Y., Arnovitz, S., Chen, P., Huang, H., Jiang, X., Hong, G.M., Kunjamma, R.B., Ren, H., et al. (2013). PBX3 is an important cofactor of HOXA9 in leukemogenesis. *Blood* *121*, 1422–1431.
- Marschalek, R. (2010). Mixed lineage leukemia: roles in human malignancies and potential therapy. *FEBS J.* *277*, 1822–1831.
- Martin, E.W., Krietsch, J., Reggiardo, R.E., Sousae, R., Kim, D.H., and Forsberg, E.C. (2021). Chromatin accessibility maps provide evidence of multilineage gene priming in hematopoietic stem cells. *Epigenetics Chromatin* *14*, 2. <https://doi.org/10.1186/s13072-020-00377-1>.
- Miller, J.P., and Allman, D. (2003). The decline in B lymphopoiesis in aged mice reflects loss of very early B-lineage precursors. *J. Immunol.* *171*, 2326–2330.
- Morrison, S.J., Wandycz, A.M., Akashi, K., Globerson, A., and Weissman, I.L. (1996). The aging of hematopoietic stem cells. *Nat. Med.* *2*, 1011–1016.
- Nakorn, T.N., Miyamoto, T., and Weissman, I.L. (2003). Characterization of mouse clonogenic megakaryocyte progenitors. *Proc. Natl. Acad. Sci. U S A* *100*, 205–210.
- Pardali, E., Dimmeler, S., Zeiher, A.M., and Rieger, M.A. (2020). Clonal hematopoiesis, aging, and cardiovascular diseases. *Exp. Hematol.* *83*, 95–104.
- Pronk, C.J.H., Rossi, D.J., Månsson, R., Attema, J.L., Norddahl, G.L., Chan, C.K.F., Sigvardsson, M., Weissman, I.L., and Bryder, D. (2007). Elucidation of the phenotypic, functional, and molecular topography of a myeloerythroid progenitor cell hierarchy. *Cell Stem Cell* *1*, 428–442.
- Rajendiran, S., Smith-Berdan, S., Kunz, L., Risolino, M., Selleri, L., Schroeder, T., and Forsberg, E.C. (2020a). Ubiquitous overexpression of CXCL12 confers radiation protection and enhances mobilization of hematopoietic stem and progenitor cells. *Stem Cells* *38*, 1159–1174.

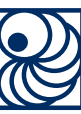

- Rajendiran, S., Boyer, S.W., and Camilla Forsberg, E. (2020b). A quantitative hematopoietic stem cell reconstitution protocol: accounting for recipient variability, tissue distribution and cell half-lives. *Stem Cell Res* *50*, 102145.
- Rossi, D.J., Bryder, D., Zahn, J.M., Ahlenius, H., Sonu, R., Wagers, A.J., and Weissman, I.L. (2005). Cell intrinsic alterations underlie hematopoietic stem cell aging. *Proc. Natl. Acad. Sci. U S A* *102*, 9194–9199.
- Sanjuan-Pla, A., Macaulay, I.C., Jensen, C.T., Woll, P.S., Luis, T.C., Mead, A., Moore, S., Carella, C., Matsuoka, S., Jones, T.B., et al. (2013). Platelet-biased stem cells reside at the apex of the haematopoietic stem-cell hierarchy. *Nature* *502*, 232–236.
- SanMiguel, J.M., Young, K., and Trowbridge, J.J. (2020). Hand in hand: intrinsic and extrinsic drivers of aging and clonal hematopoiesis. *Exp. Hematol.* *91*, 1–9.
- De Sauvage, F.J., Hass, P.E., Spencer, S.D., Malloy, B.E., Gurney, A.L., Spencer, S.A., Darbonne, W.C., Henzel, W.J., Wong, S.C., Kuang, W.J., et al. (1994). Stimulation of megakaryocytopoiesis and thrombopoiesis by the c-Mpl ligand. *Nature* *369*, 533–538.
- Schaefer, B.C., Schaefer, M.L., Kappler, J.W., Marrack, P., and Kiedl, R.M. (2001). Observation of antigen-dependent CD8<sup>+</sup> T-cell/dendritic cell interactions in vivo. *Cell. Immunol.* *214*, 110–122.
- Semerad, C.L., Mercer, E.M., Inlay, M.A., Weissman, I.L., and Murre, C. (2009). E2A proteins maintain the hematopoietic stem cell pool and promote the maturation of myelolymphoid and myeloerythroid progenitors. *Proc. Natl. Acad. Sci. U S A* *106*, 1930–1935.
- Smith-Berdan, S., Nguyen, A., Hong, M.A., and Forsberg, E.C. (2015). ROBO4-mediated vascular integrity regulates the directionality of hematopoietic stem cell trafficking. *Stem Cell Reports* *4*, 255–268.
- Smith-Berdan, S., Bercasio, A., Rajendiran, S., and Forsberg, E.C. (2019). Viagra enables efficient, single-day hematopoietic stem cell mobilization. *Stem Cell Reports* *13*, 787–792.
- Songdej, N., and Rao, A.K. (2017). Inherited platelet dysfunction and hematopoietic transcription factor mutations. *Platelets* *28*, 20–26.
- Stanley, E.R., and Chitu, V. (2014). CSF-1 receptor signaling in myeloid cells. *Cold Spring Harb. Perspect. Biol.* *6*, a021857.
- Steensma, D.P., and Ebert, B.L. (2020). Clonal hematopoiesis as a model for premalignant changes during aging. *Exp. Hematol.* *83*, 48–56.
- Sudo, K., Ema, H., Morita, Y., and Nakauchi, H. (2000). Age-associated characteristics of murine hematopoietic stem cells. *J. Exp. Med.* *192*, 1273–1280.
- Sun, D., Luo, M., Jeong, M., Rodriguez, B., Xia, Z., Hannah, R., Wang, H., Le, T., Faull, K.F., Chen, R., et al. (2014). Epigenomic profiling of young and aged HSCs reveals concerted changes during aging that reinforce self-renewal. *Cell Stem Cell* *14*, 673–688.
- Ugarte, F., Sousae, R., Cinquin, B., Martin, E.W., Krietsch, J., Sanchez, G., Inman, M., Tsang, H., Warr, M., Passequé, E., et al. (2015). Progressive chromatin condensation and H3K9 methylation regulate the differentiation of embryonic and hematopoietic stem cells. *Stem Cell Reports* *5*, 728–740.
- Valletta, S., Thomas, A., Meng, Y., Ren, X., Drissen, R., Sengül, H., Di Genua, C., and Nerlov, C. (2020). Micro-environmental sensing by bone marrow stroma identifies IL-6 and TGFβ1 as regulators of hematopoietic ageing. *Nat. Commun.* *11*, 1–13.
- Yamamoto, R., Morita, Y., Ooehara, J., Hamanaka, S., Onodera, M., Rudolph, K.L., Ema, H., and Nakauchi, H. (2013). Clonal analysis unveils self-renewing lineage-restricted progenitors generated directly from hematopoietic stem cells. *Cell* *154*, 1112–1126.
- Yamamoto, R., Wilkinson, A.C., Ooehara, J., Lan, X., Lai, C.-Y., Nakauchi, Y., Pritchard, J.K., and Nakauchi, H. (2018). Large-scale clonal analysis resolves aging of the mouse hematopoietic stem cell compartment. *Cell Stem Cell* *22*, 600–607.e4.
- Young, K., Eudy, E., Bell, R., Loberg, M., Stearns, T., Velten, L., Haas, S., and Trowbridge, J. (2020). Hematopoietic stem and progenitor cell aging is initiated at middle age through decline in local insulin-like growth factor 1 (IGF1). *BioRxiv*.
- Zhu, F., Feng, M., Sinha, R., Seita, J., Mori, Y., and Weissman, I.L. (2018). Screening for genes that regulate the differentiation of human megakaryocytic lineage cells. *Proc. Natl. Acad. Sci. U S A* *115*, E9308–E9316.
- Zhu, F., Feng, M., Sinha, R., Murphy, M.P., Luo, F., Kao, K.S., Szade, K., Seita, J., and Weissman, I.L. (2019). The GABA receptor GABRR1 is expressed on and functional in hematopoietic stem cells and megakaryocyte progenitors. *Proc. Natl. Acad. Sci. U S A* *116*, 18416–18422.



**Stem Cell Reports, Volume 16**

**Supplemental Information**

**Megakaryocyte progenitor cell function is enhanced upon aging despite the functional decline of aged hematopoietic stem cells**

**Donna M. Poscablo, Atesh K. Worthington, Stephanie Smith-Berdan, and E. Camilla Forsberg**

## **SUPPLEMENTAL INFORMATION**

### **Megakaryocyte Progenitor Cell Function is Enhanced Upon Aging Despite the Functional Decline of Aged Hematopoietic Stem Cells**

Donna M. Poscablo<sup>1,2</sup>, Atesh K. Worthington<sup>1,2</sup>, Stephanie Smith-Berdan<sup>1</sup>, E. Camilla Forsberg<sup>1,3\*</sup>

<sup>1</sup> Institute for the Biology of Stem Cells, University of California-Santa Cruz, Santa Cruz, CA, USA

<sup>2</sup> Program in Biomedical Sciences and Engineering, Department of Molecular, Cell, and Developmental Biology, University of California-Santa Cruz, Santa Cruz, CA 95064, USA.

<sup>3</sup> Biomolecular Engineering, University of California-Santa Cruz, Santa Cruz, CA, USA

\* Correspondence: cforsber@ucsc.edu

#### **Supplemental Experimental Procedures**

**Supplemental Figure 1, with legend: Related to Figure 4**

**Supplemental Table 1: Related to Figure 7**

**Supplemental Table 2: Related to Figure 7**

## SUPPLEMENTAL EXPERIMENTAL PROCEDURES

### Mouse lines

All animals were housed and bred in the AAALAC accredited vivarium at UC Santa Cruz and maintained under approved IACUC guidelines. The following mice were utilized for these experiments: C57Bl6 (JAX, cat# 664), aged C57Bl6 (NIH-ROS), BoyJ (JAX, cat# 2014), Ubc-GFP (JAX, cat# 4353).

### Flow Cytometry

Bone marrow stem and progenitor cell populations and mature cell subsets were prepared and stained as previously described (Beaudin et al., 2014, 2016; Leung et al., 2019; Martin et al., 2021; Smith-Berdan et al., 2015, 2019; Ugarte et al., 2015). Briefly, the long bones (femur and tibia) from mice were isolated, crushed with a mortar and pestle, filtered through a 70 $\mu$ m nylon filter and pelleted by centrifugation to obtain a single cell suspension. APC-conjugated spherobeads (BD Bioscience) were added to the cell suspension prior to staining cells with fluorescently labeled antibodies to cell surface antigens. Cell labeling was performed on ice in 1X PBS with 5 mM EDTA and 2% serum. The stem and progenitor populations within the bone marrow were characterized as: HSC: Lin<sup>-</sup>/cKit<sup>+</sup>/Sca1<sup>+</sup>/Flk2<sup>-</sup>/Slamf<sup>+</sup>, MPP: Lin<sup>-</sup>/cKit<sup>+</sup>/Sca1<sup>+</sup>/Flk2<sup>+</sup>/Slamf<sup>-</sup>, MkP: Lin<sup>-</sup>/cKit<sup>+</sup>/Sca1<sup>-</sup>/CD41<sup>+</sup>/Slamf<sup>+</sup>, CMP: Lin<sup>-</sup>/cKit<sup>+</sup>/Sca1<sup>-</sup>/Fc $\gamma$ R<sup>mid</sup>/CD34<sup>mid</sup>, GMP: Lin<sup>-</sup>/cKit<sup>+</sup>/Sca1<sup>-</sup>/Fc $\gamma$ R<sup>high</sup>/CD34<sup>high</sup>, MEP: Lin<sup>-</sup>/cKit<sup>+</sup>/Sca1<sup>-</sup>/Fc $\gamma$ R<sup>-</sup>/CD34<sup>-</sup>, Pre-GM (Pronk): Lin<sup>-</sup>/cKit<sup>+</sup>/Sca1<sup>-</sup>/CD41<sup>-</sup>/Fc $\gamma$ R<sup>-</sup>/CD150<sup>-</sup>/Endoglin<sup>-</sup>, Pre-Meg (Pronk): Lin<sup>-</sup>/cKit<sup>+</sup>/Sca1<sup>-</sup>/CD41<sup>-</sup>/Fc $\gamma$ R<sup>-</sup>/CD150<sup>+</sup>/Endoglin<sup>-</sup>, Pre-CFU-E (Pronk): Lin<sup>-</sup>/cKit<sup>+</sup>/Sca1<sup>-</sup>/CD41<sup>-</sup>/Fc $\gamma$ R<sup>-</sup>/CD150<sup>+</sup>/Endoglin<sup>+</sup>. Mature cells were characterized by: erythroid cells as circulating erythrocyte progenitors: (FSC<sup>lo-mid</sup>/Ter-119<sup>+</sup>/CD71<sup>+</sup>/Mac1<sup>-</sup>/Gr1<sup>-</sup>/B220<sup>-</sup>/CD3<sup>-</sup>) or erythrocytes: (FSC<sup>lo-mid</sup>/Ter-119<sup>+</sup>/CD61<sup>-</sup>/Mac1<sup>-</sup>/Gr1<sup>-</sup>/B220<sup>-</sup>/CD3<sup>-</sup>), platelets: (SSC<sup>lo</sup>/Ter-119<sup>-</sup>/CD61<sup>+</sup>/Mac1<sup>-</sup>/Gr1<sup>-</sup>/B220<sup>-</sup>/CD3<sup>-</sup>), GM (Ter-119<sup>-</sup>/CD61<sup>-</sup>/Mac1<sup>+</sup>/Gr1<sup>+</sup>/B220<sup>-</sup>/CD3<sup>-</sup>), B-cell (Ter-119<sup>-</sup>/CD61<sup>-</sup>/Mac1<sup>-</sup>/Gr1<sup>-</sup>/B220<sup>+</sup>/CD3<sup>-</sup>), T-cell (Ter-119<sup>-</sup>/CD61<sup>-</sup>/Mac1<sup>-</sup>/Gr1<sup>-</sup>/B220<sup>-</sup>/CD3<sup>+</sup>). Cell suspensions were analyzed for specific cell populations using FACS Aria III (Becton Dickinson, San Jose, CA).

The lineage cocktail was comprised of CD3 (Biolegend cat #100306), CD4 (Biolegend cat #100423), CD5 (Biolegend cat #100612), CD8 (Biolegend cat #100723), Ter-119 (Biolegend cat #116215), Mac1 (Biolegend cat #101217), Gr1 (Biolegend cat #108417), and B220 (Biolegend cat #103225). Antibodies used in sorting were:

cKit(Biolegend cat #105826), Sca1 (Biolegend cat #122520), CD150 (Biolegend cat #115914), FLK2 (ebiosciences cat #12-1351-83), CD34 (ebiosciences cat #13-0341-85), CD41 (Biolegend cat #133914), CD105 (Biolegend cat #120402). Antibodies used in peripheral blood were: CD71 (Biolegend cat # 113803), CD61 (Biolegend cat # 104314), CD3 (Biolegend cat #100306), TER-119 (Biolegend cat #116215), Mac1 (Biolegend cat #101217), Gr1 (Biolegend cat #108417), and B220 (Biolegend cat #103225).

#### HSC and MkP sorts by Flow Cytometry

HSC (Lin<sup>-</sup>/cKit<sup>+</sup>/Sca1<sup>+</sup>/Flk2<sup>-</sup>/Slam<sup>+</sup>) or MkP (Lin<sup>-</sup>/cKit<sup>+</sup>/Sca1<sup>-</sup>/CD41<sup>+</sup>/Slam<sup>+</sup>) from young or old mice were prospectively isolated using a FACS ARIA III (Becton Dickinson, San Jose, CA) as previously described (Boyer et al., 2019; Leung et al., 2019; Martin et al., 2021). Cells were harvested from long bones as mentioned above and stained with CD117-microbeads (Miltenyi), then passed over a magnetic column to enrich for CD117<sup>+</sup> stem and progenitor cells. HSC and MkP cell populations were double-sorted on low pressure with a 100 $\mu$ m nozzle into PBS, 2% serum.

#### Transplantation Reconstitution assays

Reconstitution assays were performed by transplanting double-sorted HSCs (200 per recipient) from young or old Ubc-GFP<sup>+</sup> whole bone marrow and transplanting into congenic C57Bl6 mice via retro-orbital intravenous transplant. We also transplanted double-sorted MkPs (22,000 per recipient) from C57Bl6 into Ubc-GFP<sup>+</sup> hosts. Hosts were preconditioned with sub-lethal radiation (~750 rads) using a Faxitron CP160 X-ray instrument (Precision Instruments). Recipient mice were bled via the tail vein at the indicated intervals post-transplantation for analysis of peripheral blood donor chimerism. APC-labeled spherobeads were added to whole peripheral blood prior to staining with B220-APCy7, CD3-A700, Mac1-PECy7, Ter119-PECy5, Gr1-PB, CD71-Biotin/STA-BV605, and CD61-Alexa-647 (Biolegend) to detect mature lineage subsets for both host and donor mice. Cell suspensions were analyzed by FACS Aria III or LSR II (Becton Dickinson, San Jose, CA) for whole blood phenotypes and again post red blood cell lysis with a hypotonic alkaline lysis solution (ACK). Cells counts were calculated based on the number of cells analyzed and known number spherobeads added per sample.

### *In vitro* Proliferation

Megakaryocyte progenitors were prospectively isolated using CD117-Microbead enrichment (Miltenyi) and sorted by fluorescence-activated cell sorting (FACS) from young (6-12 weeks old) and old WT (20-24 months old) mice as previously described (Smith-Berdan et al., 2015). 2000 cells were plated per well into a 96-well U-bottom tissue culture plate. Sorted cells were cultured for 3 days (MkP) in 200 $\mu$ l/well containing IMDM medium (Fisher) supplemented with 10% FBS, 50ng/ml rmTPO, 20ng/ml rmlL-6, 20ng/ml of rmlL-11, 50ng/ml of rmSCF, and 10ng/ml rmlL-3 (Cytokines from Peprotech) and Primocin (Invivogen). On days 3 APC-labeled spherobeads (BD Bioscience) were added to appropriate wells with cells and triplicate samples were analyzed using a FACSAria (Becton Dickinson, San Jose, CA). Cell expansion rates were calculated based on the number of beads recovered per beads added per well.

# SUPPLEMENTAL FIGURE 1

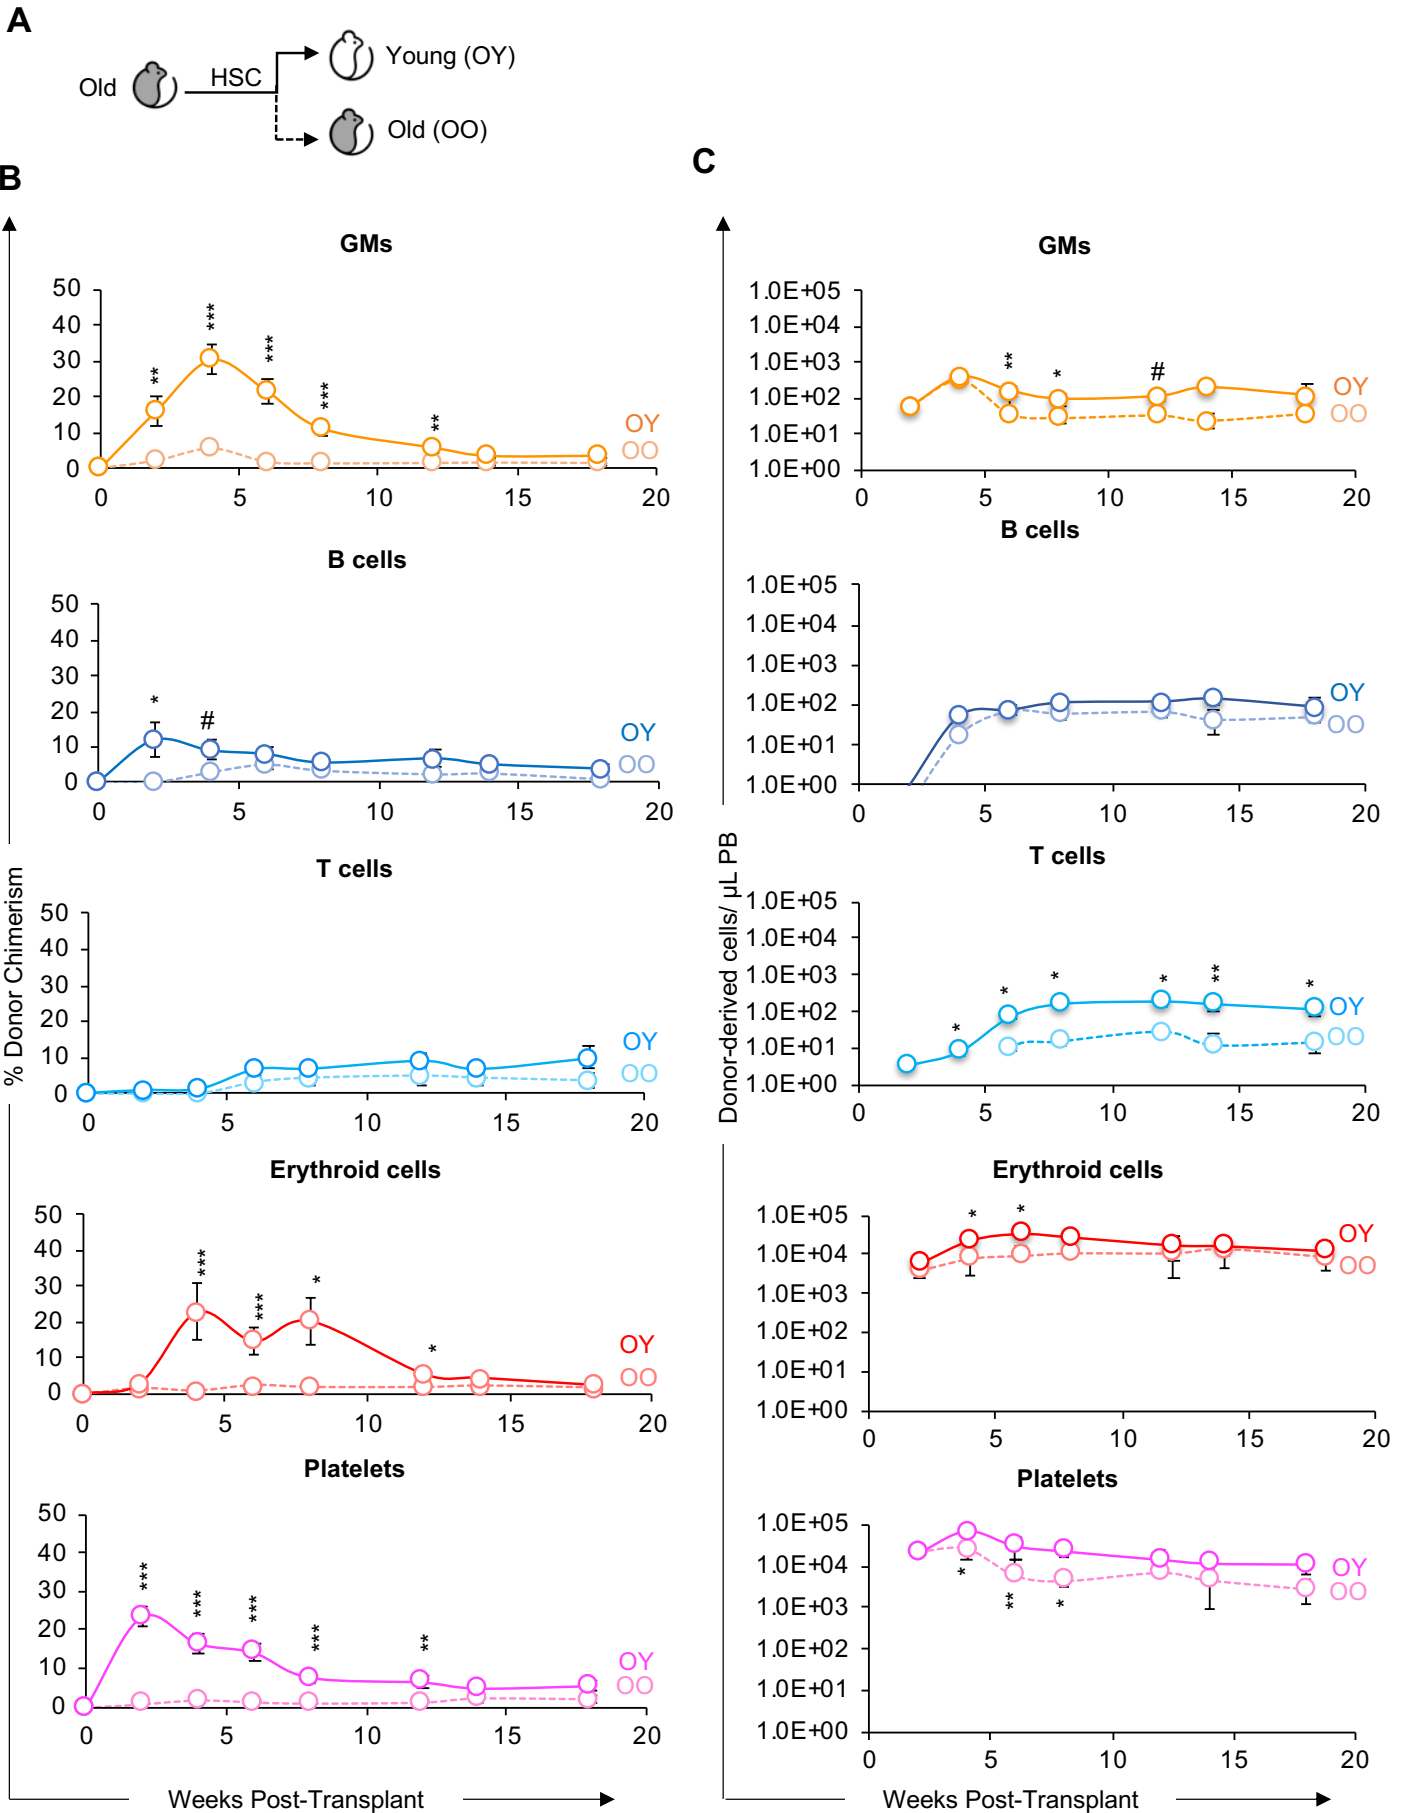

**Supplemental Figure 1: Old HSCs exhibited lower reconstitution potential in old compared to young recipients**

(A) Schematic of transplantation of HSCs from old mice into separate cohorts of young or old mice.

(B) Old HSCs displayed lower donor-host-chimerism in the old recipients compared to in young recipients.

Analysis of donor-derived mature cells (GMs, B cells, T cells, erythroid cells, and platelets) in peripheral blood of recipients presented as percent donor chimerism.

(C) Old HSCs produced fewer total mature cells in old recipients compared to in young recipients.

Reconstitution data from (B) replotted as absolute number of donor-derived GMs, B cells, T cells, erythroid cells, and platelets per microliter of peripheral blood.

Data are representative means  $\pm$  SEM from 12 young recipient mice (7 independent experiments) and 8 old recipient mice (3 independent experiments). P values were determined using unpaired two-tailed t-test. \*p < 0.05, \*\*p < 0.005, \*\*\*p < 0.0005.

# SUPPLEMENTAL TABLE 1

**Table 1: Top 50 differentially expressed genes between young and old MkPs**

| Gene symbol | Log2 Fold Change | P-value  | Basemean Young | Basemean Old |
|-------------|------------------|----------|----------------|--------------|
| Tubb6       | -1.5234473       | 8.40E-08 | 3.90E+02       | 1.35E+02     |
| AI506816    | -1.4245791       | 8.12E-04 | 7.89E+03       | 2.94E+03     |
| Tmem97      | -1.3199598       | 7.64E-04 | 2.94E+03       | 1.18E+03     |
| Atp5k       | -1.2412058       | 1.39E-03 | 1.23E+03       | 5.21E+02     |
| Emid1       | -1.2234213       | 5.17E-03 | 1.74E+03       | 7.44E+02     |
| Dnajc15     | -1.1961287       | 5.12E-03 | 2.48E+03       | 1.08E+03     |
| Bckdhb      | -1.1225232       | 1.72E-03 | 4.86E+02       | 2.24E+02     |
| Phgdh       | -1.094522        | 5.00E-03 | 9.78E+03       | 4.58E+03     |
| Nup37       | -1.0609982       | 6.96E-04 | 8.68E+02       | 4.17E+02     |
| Tbrg4       | -1.0608148       | 6.07E-04 | 9.99E+02       | 4.79E+02     |
| Uqcc2       | -1.0583517       | 8.25E-04 | 1.77E+03       | 8.51E+02     |
| Hspe1       | -1.0582077       | 2.34E-03 | 4.33E+03       | 2.08E+03     |
| Timm8a1     | -1.0572596       | 3.59E-03 | 2.14E+03       | 1.03E+03     |
| Tmem258     | -1.0394034       | 2.15E-03 | 1.29E+03       | 6.30E+02     |
| Tysnd1      | -1.0359832       | 4.98E-04 | 2.15E+03       | 1.05E+03     |
| Rpf2        | -1.0327924       | 1.70E-03 | 9.38E+02       | 4.59E+02     |
| Mecr        | -1.0214637       | 2.34E-07 | 6.37E+02       | 3.15E+02     |
| Yars        | -1.0198991       | 3.54E-03 | 1.97E+03       | 9.71E+02     |
| F10         | -1.0169751       | 1.05E-04 | 1.13E+03       | 5.60E+02     |
| Gchfr       | -1.0166502       | 6.24E-03 | 3.92E+02       | 1.94E+02     |
| Asns        | -1.0166478       | 3.58E-03 | 3.50E+03       | 1.73E+03     |
| Wdr18       | -1.0000778       | 7.12E-04 | 5.85E+03       | 2.93E+03     |
| Mrps18a     | -0.9960708       | 2.40E-04 | 3.19E+03       | 1.60E+03     |
| Coq7        | -0.9954788       | 2.70E-03 | 1.26E+03       | 6.32E+02     |
| Atp5e       | -0.9929881       | 2.03E-03 | 2.24E+03       | 1.13E+03     |
| Pik3ip1     | 2.1552087        | 1.66E-03 | 2.42E+02       | 1.08E+03     |
| AK165889    | 2.1835855        | 1.01E-03 | 1.50E+02       | 6.81E+02     |
| Selp        | 2.2508835        | 8.79E-04 | 4.96E+02       | 2.36E+03     |
| Krt18       | 2.2564015        | 3.52E-04 | 2.25E+02       | 1.07E+03     |
| Nfkbia      | 2.3271007        | 1.32E-06 | 4.50E+02       | 2.26E+03     |
| Selm        | 2.4368411        | 1.28E-03 | 1.22E+02       | 6.59E+02     |
| Selm        | 2.4466799        | 1.21E-03 | 1.19E+02       | 6.48E+02     |
| Hbb-bt      | 2.4514855        | 1.05E-03 | 2.92E+02       | 1.60E+03     |
| Gstm2       | 2.4781945        | 2.66E-03 | 1.74E+02       | 9.67E+02     |
| Clu         | 2.6034299        | 6.48E-03 | 7.73E+02       | 4.70E+03     |
| Hbb-bs      | 2.8180971        | 5.94E-04 | 6.86E+02       | 4.83E+03     |
| Lcp1        | 2.8224804        | 1.14E-06 | 1.75E+02       | 1.24E+03     |
| Tgm2        | 2.8253432        | 2.47E-04 | 1.10E+02       | 7.81E+02     |
| Nupr1       | 2.8873895        | 6.77E-05 | 1.92E+02       | 1.42E+03     |
| H2-Ab1      | 2.9240602        | 3.72E-10 | 2.63E+02       | 1.99E+03     |
| Galnt6      | 2.9439361        | 2.55E-05 | 1.02E+02       | 7.87E+02     |
| C1qb        | 3.0211859        | 4.90E-03 | 3.14E+02       | 2.55E+03     |
| C1qc        | 3.1118748        | 4.54E-03 | 1.30E+02       | 1.12E+03     |
| Aldh1a1     | 3.8871329        | 2.06E-15 | 1.29E+02       | 1.91E+03     |
| S100a8      | 4.7393422        | 2.40E-04 | 2.05E+02       | 5.47E+03     |
| Ngp         | 5.4444377        | 7.87E-05 | 8.30E+02       | 3.61E+04     |
| Cd74        | 5.5091778        | 3.86E-25 | 1.61E+02       | 7.35E+03     |
| Camp        | 5.9138395        | 2.85E-05 | 1.02E+02       | 6.13E+03     |
| Chil3       | 6.0448889        | 5.37E-05 | 1.02E+02       | 6.77E+03     |
| Ltf         | 6.1725772        | 2.75E-05 | 2.76E+02       | 1.99E+04     |
